# Supplementary material
Source: MDPI journal article supplement (https://www.mdpi.com/search?q=molecules-25-00139)
Supplement: s001 [file molecules-25-00139-s001.pdf]

# Supporting Information

## New Dammarane-Type Triterpenoid Saponins from *Panax notoginseng* Leaves and Their Nitric Oxide Inhibitory Activities

Fan Sun <sup>1,†</sup>, Jingya Ruan <sup>1,†</sup>, Wei Zhao <sup>1</sup>, Ying Zhang <sup>2</sup>, Guilin Xiang <sup>3</sup>, Jiejing Yan <sup>2</sup>, Mimi Hao <sup>2</sup>, Lijie Wu <sup>1</sup>, Yi Zhang <sup>1,2,\*</sup> and Tao Wang <sup>1,2,\*</sup>

<sup>1</sup> Tianjin Key Laboratory of TCM Chemistry and Analysis, Tianjin University of Traditional Chinese Medicine, 10 Poyanghu Road, West Area, Tuanbo New Town, Jinghai District, Tianjin 301617, China; sf18435165322@163.com (F.S.), Ruanjy19930919@163.com (J.R.); zhaowei126123@126.com (W.Z.); wulj0816@163.com (L.W.)

<sup>2</sup> Institute of TCM, Tianjin University of Traditional Chinese Medicine, 10 Poyanghu Road, West Area, Tuanbo New Town, Jinghai District, Tianjin 301617, China; zyingtzy@163.com (Y.Z.); 17320072093@163.com (J.Y.); haomimi126@126.com (M.H.)

<sup>3</sup> WenshanMiaoxiangSanqi Limited company, South KaihuaRoad, Wenshan City 663000, Yunnan Province, China; xiangguilin@126.com

\* Correspondence: zhwwxzh@tjutcm.edu.cn (Y.Z.); wangtao@tjutcm.edu.cn (T.W.); Tel./Fax: +86-22-5959-6168 (T.W.)

† These authors contributed equally to this work.

|            |                                                                                              |    |
|------------|----------------------------------------------------------------------------------------------|----|
| Figure S1  | $^1\text{H}$ NMR (500 MHz, $\text{C}_5\text{D}_5\text{N}$ ) spectrum of <b>1</b> .....       | 4  |
| Figure S2  | $^{13}\text{C}$ NMR (125 MHz, $\text{C}_5\text{D}_5\text{N}$ ) spectrum of <b>1</b> .....    | 4  |
| Figure S3  | $^1\text{H}$ $^1\text{H}$ COSY ( $\text{C}_5\text{D}_5\text{N}$ ) spectrum of <b>1</b> ..... | 5  |
| Figure S4  | HSQC ( $\text{C}_5\text{D}_5\text{N}$ ) spectrum of <b>1</b> .....                           | 6  |
| Figure S6  | HSQC-TOCSY ( $\text{C}_5\text{D}_5\text{N}$ ) spectrum of <b>1</b> .....                     | 6  |
| Figure S7  | ESI-Q-Orbitrap-MS spectrum of <b>1</b> .....                                                 | 7  |
| Figure S8  | $^1\text{H}$ NMR (500 MHz, $\text{C}_5\text{D}_5\text{N}$ ) spectrum of <b>2</b> .....       | 8  |
| Figure S9  | $^{13}\text{C}$ NMR (125 MHz, $\text{C}_5\text{D}_5\text{N}$ ) spectrum of <b>2</b> .....    | 8  |
| Figure S10 | $^1\text{H}$ $^1\text{H}$ COSY ( $\text{C}_5\text{D}_5\text{N}$ ) spectrum of <b>2</b> ..... | 9  |
| Figure S11 | HSQC ( $\text{C}_5\text{D}_5\text{N}$ ) spectrum of <b>2</b> .....                           | 9  |
| Figure S12 | HMBC ( $\text{C}_5\text{D}_5\text{N}$ ) spectrum of <b>2</b> .....                           | 10 |
| Figure S13 | HSQC-TOCSY ( $\text{C}_5\text{D}_5\text{N}$ ) spectrum of <b>2</b> .....                     | 10 |
| Figure S14 | ESI-Q-Orbitrap-MS spectrum of <b>2</b> .....                                                 | 11 |
| Figure S15 | $^1\text{H}$ NMR (500 MHz, $\text{C}_5\text{D}_5\text{N}$ ) spectrum of <b>3</b> .....       | 12 |
| Figure S16 | $^{13}\text{C}$ NMR (125 MHz, $\text{C}_5\text{D}_5\text{N}$ ) spectrum of <b>3</b> .....    | 12 |
| Figure S17 | $^1\text{H}$ $^1\text{H}$ COSY ( $\text{C}_5\text{D}_5\text{N}$ ) spectrum of <b>3</b> ..... | 13 |
| Figure S18 | HSQC ( $\text{C}_5\text{D}_5\text{N}$ ) spectrum of <b>3</b> .....                           | 13 |
| Figure S19 | HMBC ( $\text{C}_5\text{D}_5\text{N}$ ) spectrum of <b>3</b> .....                           | 14 |
| Figure S20 | HSQC-TOCSY ( $\text{C}_5\text{D}_5\text{N}$ ) spectrum of <b>3</b> .....                     | 14 |
| Figure S21 | ESI-Q-Orbitrap-MS spectrum of <b>3</b> .....                                                 | 15 |
| Figure S22 | $^1\text{H}$ NMR (500 MHz, $\text{C}_5\text{D}_5\text{N}$ ) spectrum of <b>4</b> .....       | 16 |
| Figure S23 | $^{13}\text{C}$ NMR (125 MHz, $\text{C}_5\text{D}_5\text{N}$ ) spectrum of <b>4</b> .....    | 16 |
| Figure S24 | $^1\text{H}$ $^1\text{H}$ COSY ( $\text{C}_5\text{D}_5\text{N}$ ) spectrum of <b>4</b> ..... | 17 |
| Figure S25 | HSQC ( $\text{C}_5\text{D}_5\text{N}$ ) spectrum of <b>4</b> .....                           | 17 |
| Figure S26 | HMBC ( $\text{C}_5\text{D}_5\text{N}$ ) spectrum of <b>4</b> .....                           | 18 |
| Figure S27 | NOSEY ( $\text{C}_5\text{D}_5\text{N}$ ) spectrum of <b>4</b> .....                          | 18 |
| Figure S28 | ESI-Q-Orbitrap-MS spectrum of <b>4</b> .....                                                 | 19 |
| Figure S29 | $^1\text{H}$ NMR (500 MHz, $\text{C}_5\text{D}_5\text{N}$ ) spectrum of <b>5</b> .....       | 20 |
| Figure S30 | $^{13}\text{C}$ NMR (125 MHz, $\text{C}_5\text{D}_5\text{N}$ ) spectrum of <b>5</b> .....    | 20 |
| Figure S31 | $^1\text{H}$ $^1\text{H}$ COSY ( $\text{C}_5\text{D}_5\text{N}$ ) spectrum of <b>5</b> ..... | 21 |
| Figure S32 | HSQC ( $\text{C}_5\text{D}_5\text{N}$ ) spectrum of <b>5</b> .....                           | 21 |
| Figure S33 | HMBC ( $\text{C}_5\text{D}_5\text{N}$ ) spectrum of <b>5</b> .....                           | 22 |
| Figure S34 | ESI-Q-Orbitrap-MS spectrum of <b>5</b> .....                                                 | 22 |
| Figure S35 | $^1\text{H}$ NMR (500 MHz, $\text{C}_5\text{D}_5\text{N}$ ) spectrum of <b>6</b> .....       | 23 |
| Figure S36 | $^{13}\text{C}$ NMR (125 MHz, $\text{C}_5\text{D}_5\text{N}$ ) spectrum of <b>6</b> .....    | 23 |
| Figure S37 | $^1\text{H}$ $^1\text{H}$ COSY ( $\text{C}_5\text{D}_5\text{N}$ ) spectrum of <b>6</b> ..... | 24 |
| Figure S38 | HSQC ( $\text{C}_5\text{D}_5\text{N}$ ) spectrum of <b>6</b> .....                           | 24 |
| Figure S39 | HMBC ( $\text{C}_5\text{D}_5\text{N}$ ) spectrum of <b>6</b> .....                           | 25 |
| Figure S40 | HSQC-TOCSY ( $\text{C}_5\text{D}_5\text{N}$ ) spectrum of <b>6</b> .....                     | 25 |
| Figure S41 | ESI-Q-Orbitrap-MS spectrum of <b>6</b> .....                                                 | 26 |
| Figure S42 | $^1\text{H}$ NMR (600 MHz, $\text{C}_5\text{D}_5\text{N}$ ) spectrum of <b>7</b> .....       | 27 |
| Figure S43 | $^{13}\text{C}$ NMR (150 MHz, $\text{C}_5\text{D}_5\text{N}$ ) spectrum of <b>7</b> .....    | 27 |
| Figure S44 | $^1\text{H}$ $^1\text{H}$ COSY ( $\text{C}_5\text{D}_5\text{N}$ ) spectrum of <b>7</b> ..... | 28 |

|            |                                                                                                  |    |
|------------|--------------------------------------------------------------------------------------------------|----|
| Figure S45 | HSQC (C <sub>5</sub> D <sub>5</sub> N) spectrum of <b>7</b> .....                                | 28 |
| Figure S46 | HMBC (C <sub>5</sub> D <sub>5</sub> N) spectrum of <b>7</b> .....                                | 29 |
| Figure S47 | ESI-Q-Orbitrap-MS spectrum of <b>7</b> .....                                                     | 29 |
| Figure S48 | <sup>1</sup> H NMR (500 MHz, C <sub>5</sub> D <sub>5</sub> N) spectrum of <b>8</b> .....         | 30 |
| Figure S49 | <sup>13</sup> C NMR (125 MHz, C <sub>5</sub> D <sub>5</sub> N) spectrum of <b>8</b> .....        | 30 |
| Figure S50 | <sup>1</sup> H <sup>1</sup> H COSY (C <sub>5</sub> D <sub>5</sub> N) spectrum of <b>8</b> .....  | 31 |
| Figure S51 | HSQC (C <sub>5</sub> D <sub>5</sub> N) spectrum of <b>8</b> .....                                | 31 |
| Figure S52 | HMBC (C <sub>5</sub> D <sub>5</sub> N) spectrum of <b>8</b> .....                                | 32 |
| Figure S53 | ESI-Q-Orbitrap-MS spectrum of <b>8</b> .....                                                     | 32 |
| Figure S54 | <sup>1</sup> H NMR (500 MHz, C <sub>5</sub> D <sub>5</sub> N) spectrum of <b>9</b> .....         | 33 |
| Figure S55 | <sup>13</sup> C NMR (125 MHz, C <sub>5</sub> D <sub>5</sub> N) spectrum of <b>9</b> .....        | 33 |
| Figure S56 | <sup>1</sup> H <sup>1</sup> H COSY (C <sub>5</sub> D <sub>5</sub> N) spectrum of <b>9</b> .....  | 34 |
| Figure S57 | HSQC (C <sub>5</sub> D <sub>5</sub> N) spectrum of <b>9</b> .....                                | 34 |
| Figure S58 | HMBC (C <sub>5</sub> D <sub>5</sub> N) spectrum of <b>9</b> .....                                | 35 |
| Figure S59 | ESI-Q-Orbitrap-MS spectrum of <b>9</b> .....                                                     | 35 |
| Figure S60 | <sup>1</sup> H NMR (500 MHz, C <sub>5</sub> D <sub>5</sub> N) spectrum of <b>10</b> .....        | 36 |
| Figure S61 | <sup>13</sup> C NMR (125 MHz, C <sub>5</sub> D <sub>5</sub> N) spectrum of <b>10</b> .....       | 36 |
| Figure S62 | <sup>1</sup> H <sup>1</sup> H COSY (C <sub>5</sub> D <sub>5</sub> N) spectrum of <b>10</b> ..... | 37 |
| Figure S63 | HSQC (C <sub>5</sub> D <sub>5</sub> N) spectrum of <b>10</b> .....                               | 37 |
| Figure S64 | HMBC (C <sub>5</sub> D <sub>5</sub> N) spectrum of <b>10</b> .....                               | 38 |
| Figure S65 | HSQC-TOCSY (C <sub>5</sub> D <sub>5</sub> N) spectrum of <b>10</b> .....                         | 38 |
| Figure S66 | ESI-Q-Orbitrap-MS spectrum of <b>10</b> .....                                                    | 39 |
| Figure S67 | <sup>1</sup> H NMR (500 MHz, C <sub>5</sub> D <sub>5</sub> N) spectrum of <b>11</b> .....        | 40 |
| Figure S68 | <sup>13</sup> C NMR (125 MHz, C <sub>5</sub> D <sub>5</sub> N) spectrum of <b>11</b> .....       | 41 |
| Figure S69 | <sup>1</sup> H <sup>1</sup> H COSY (C <sub>5</sub> D <sub>5</sub> N) spectrum of <b>11</b> ..... | 41 |
| Figure S70 | HSQC (C <sub>5</sub> D <sub>5</sub> N) spectrum of <b>11</b> .....                               | 42 |
| Figure S71 | HMBC (C <sub>5</sub> D <sub>5</sub> N) spectrum of <b>11</b> .....                               | 42 |
| Figure S72 | NOSEY (C <sub>5</sub> D <sub>5</sub> N) spectrum of <b>11</b> .....                              | 43 |
| Figure S73 | ESI-Q-Orbitrap-MS spectrum of <b>11</b> .....                                                    | 43 |
| Figure S74 | MTT assay of compounds <b>1–11</b> at the concentration of 50 μM.....                            | 44 |

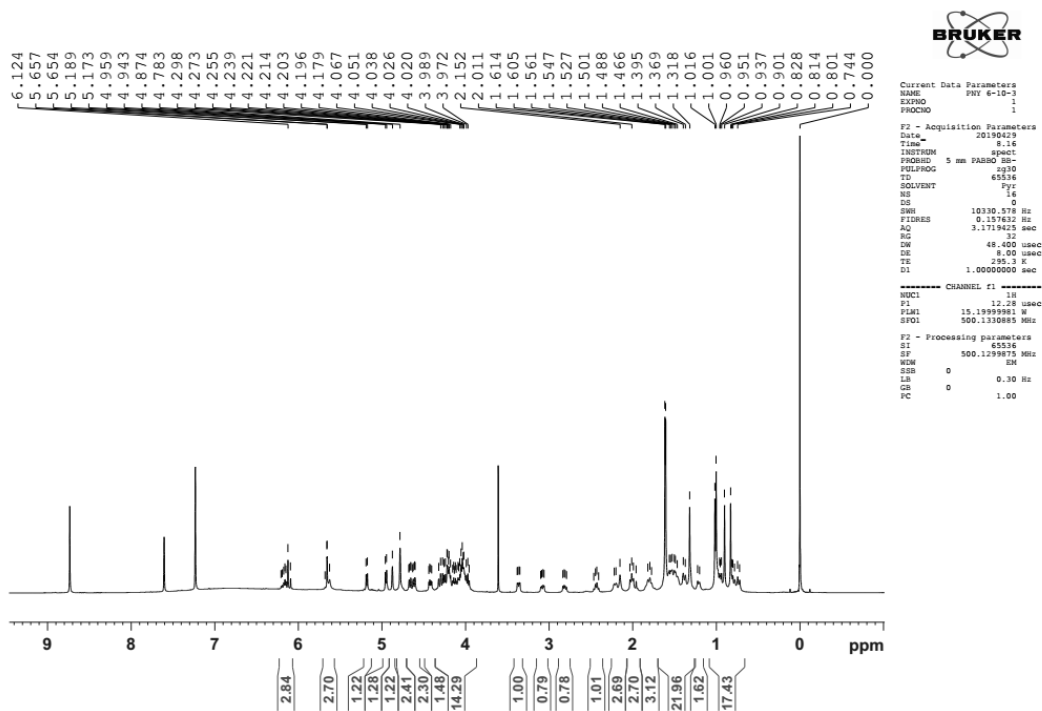

Figure S1 <sup>1</sup>H NMR (500 MHz, C<sub>5</sub>D<sub>5</sub>N) spectrum of 1

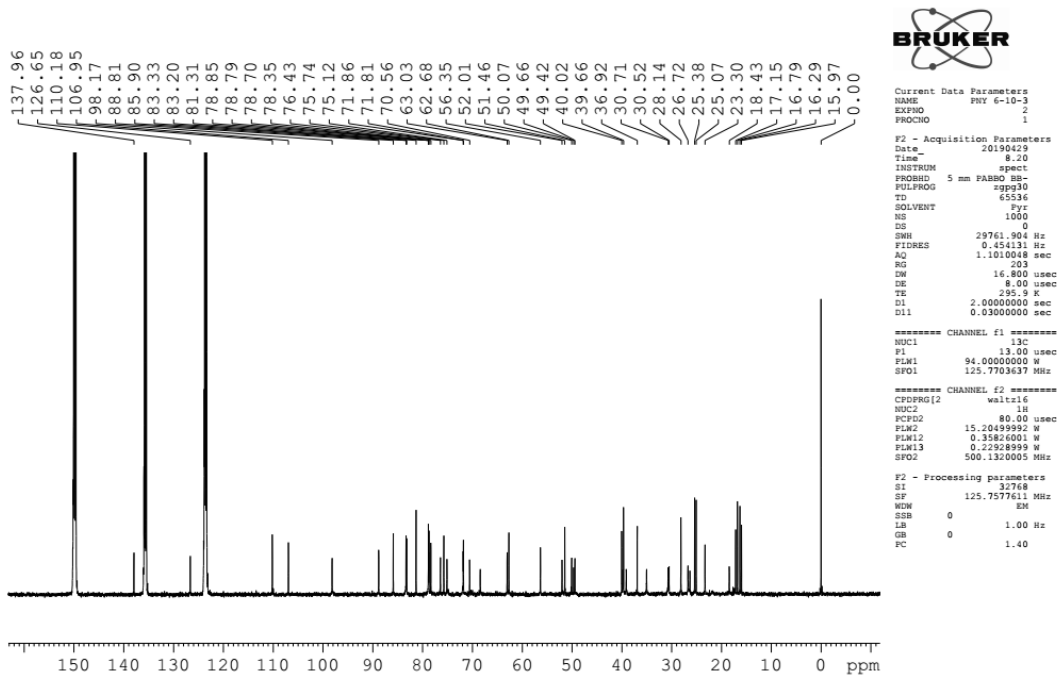

Figure S2 <sup>13</sup>C NMR (125 MHz, C<sub>5</sub>D<sub>5</sub>N) spectrum of 1

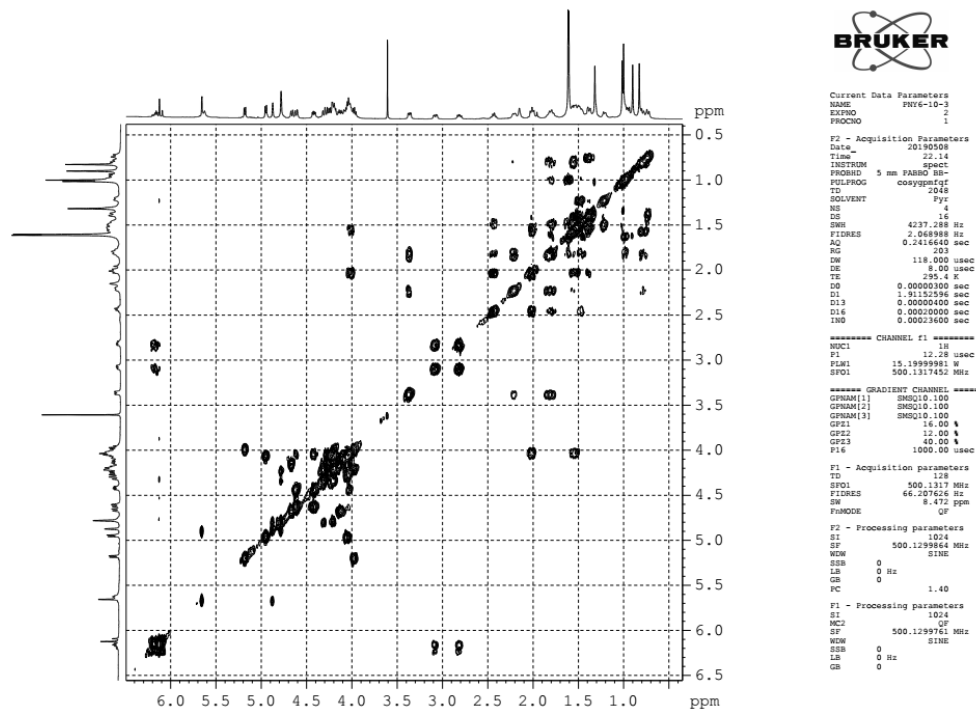

Figure S3  $^1\text{H}$   $^1\text{H}$  COSY ( $\text{C}_5\text{D}_5\text{N}$ ) spectrum of 1

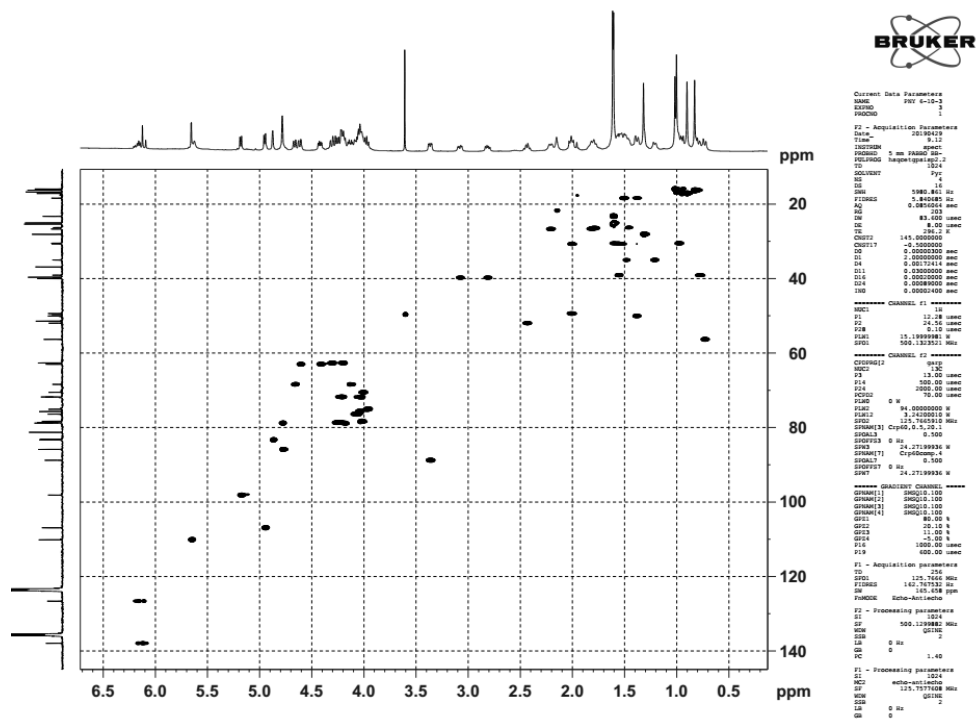

Figure S4 HSQC ( $\text{C}_5\text{D}_5\text{N}$ ) spectrum of 1

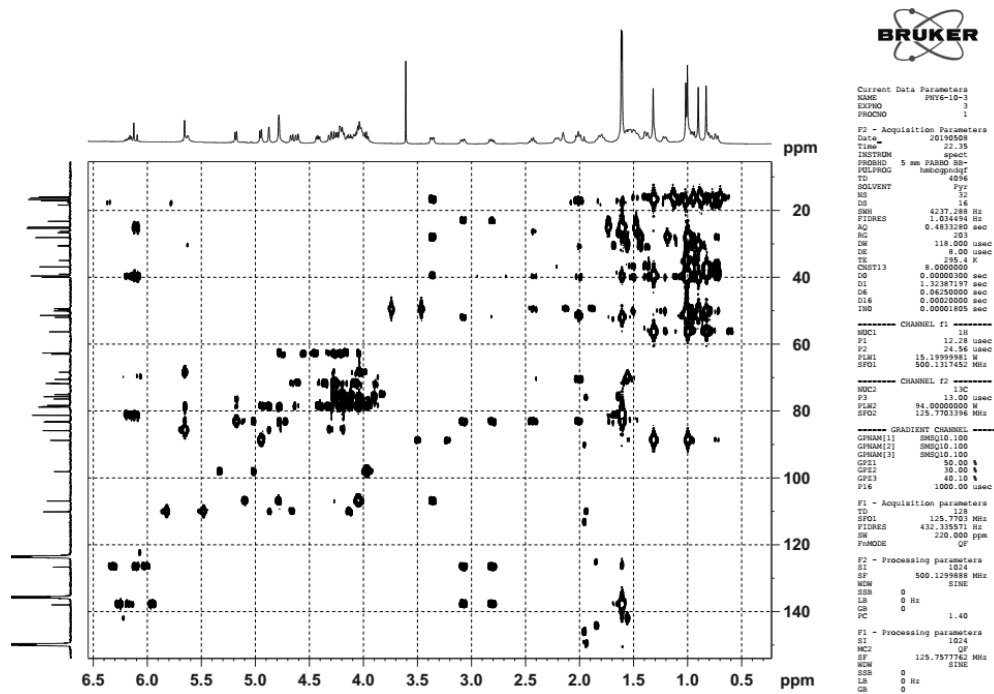

Figure S5 HMBC (C<sub>5</sub>D<sub>5</sub>N) spectrum of 1

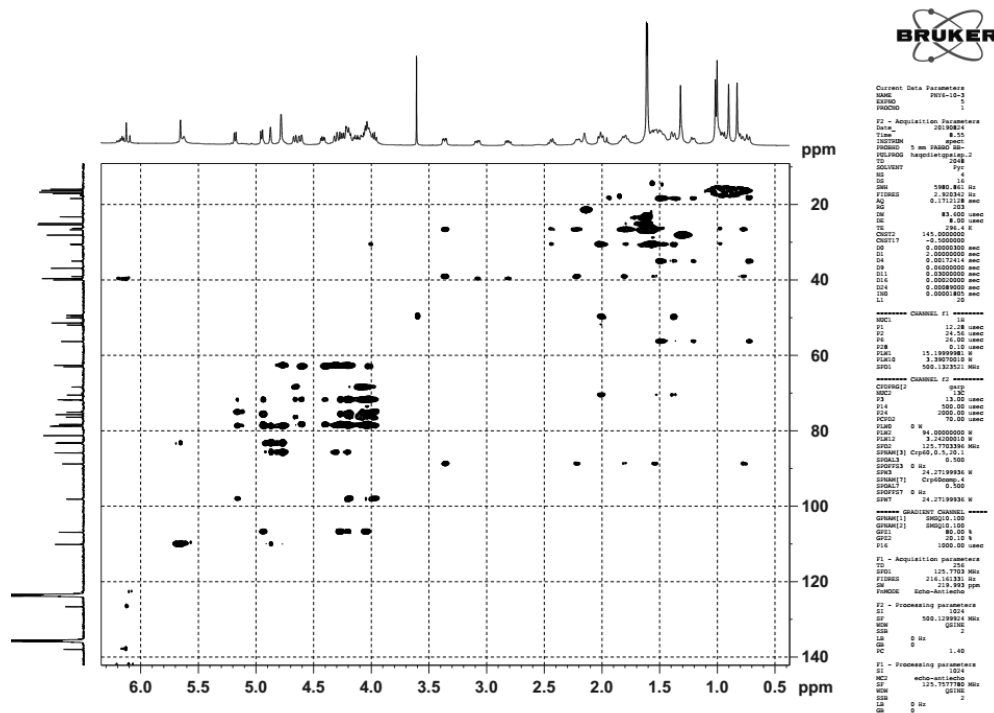

Figure S6 HSQC-TOCSY (C<sub>5</sub>D<sub>5</sub>N) spectrum of 1

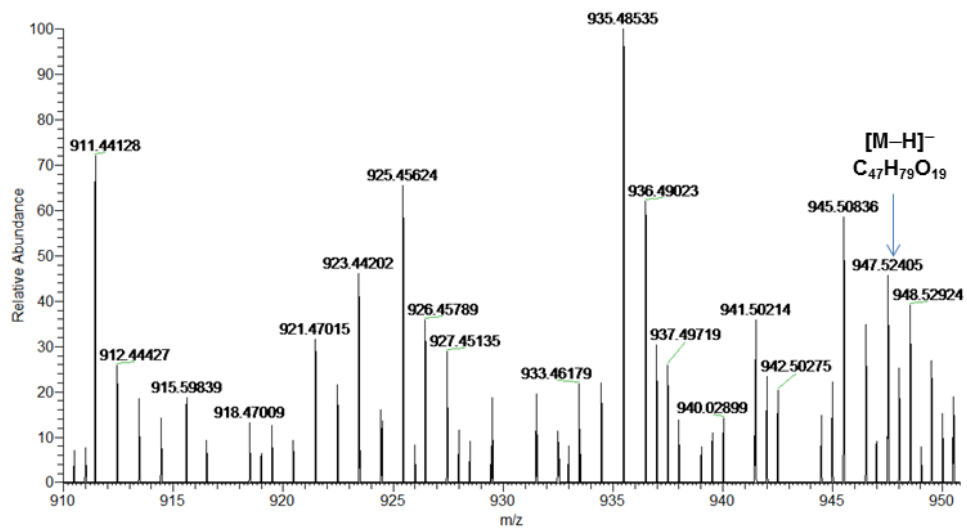

Figure S7 ESI-Q-Orbitrap-MS spectrum of 1

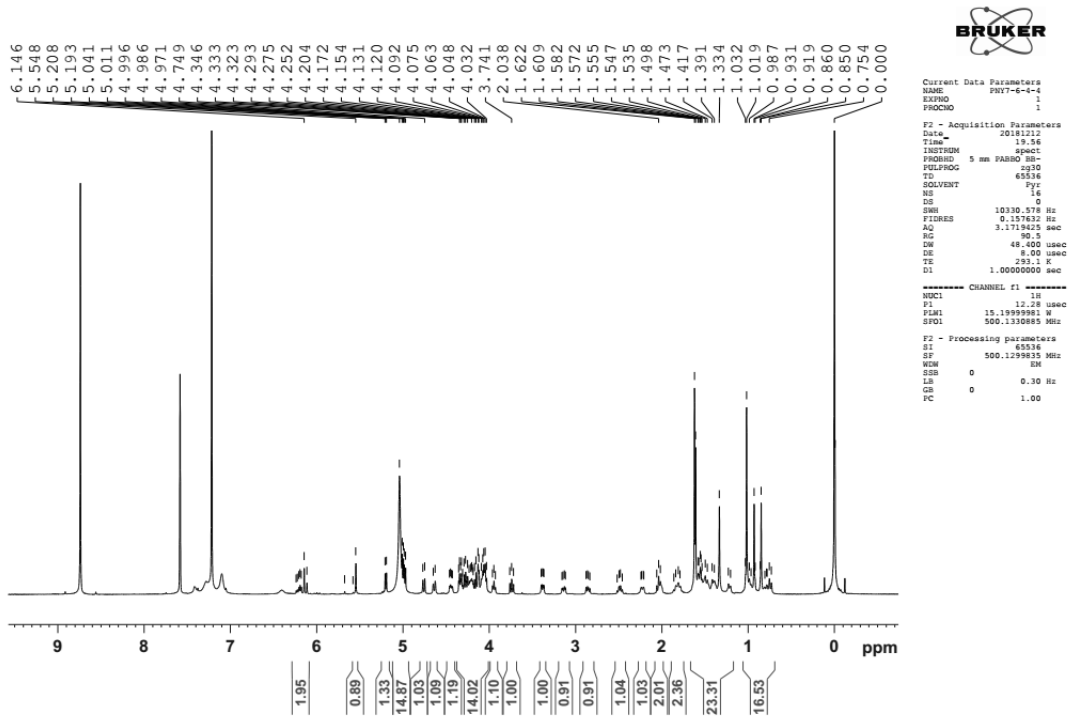

Figure S8 <sup>1</sup>H NMR (500 MHz, C<sub>5</sub>D<sub>5</sub>N) spectrum of 2

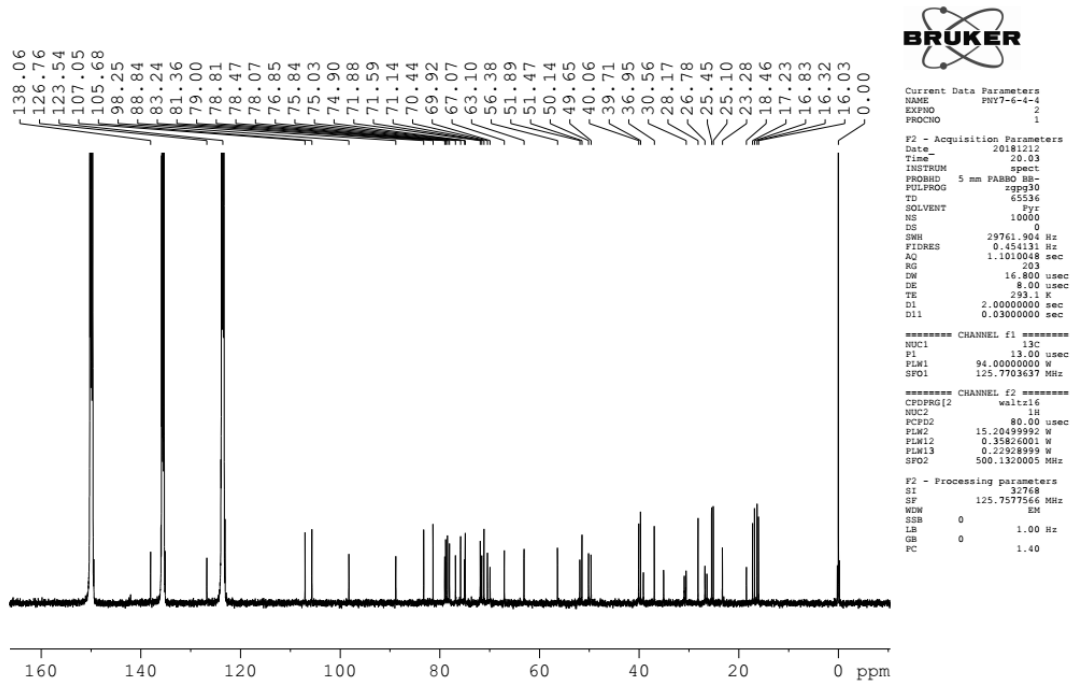



Figure S9  $^{13}\text{C}$  NMR (125 MHz,  $\text{C}_5\text{D}_5\text{N}$ ) spectrum of 2

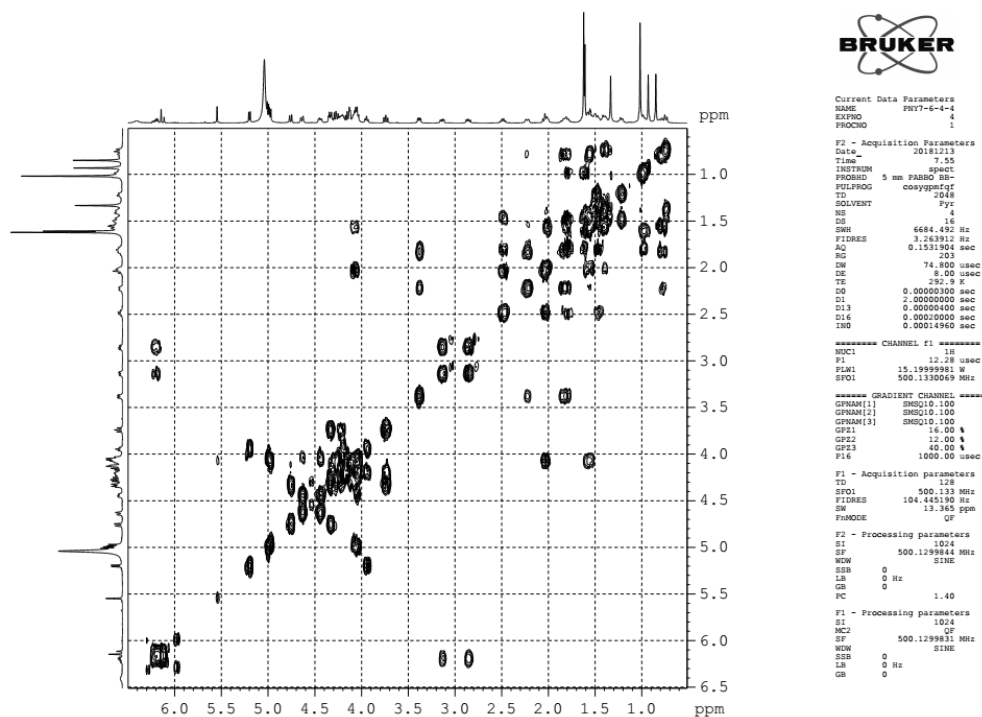

Figure S10  $^1\text{H}$   $^1\text{H}$  COSY ( $\text{C}_5\text{D}_5\text{N}$ ) spectrum of 2

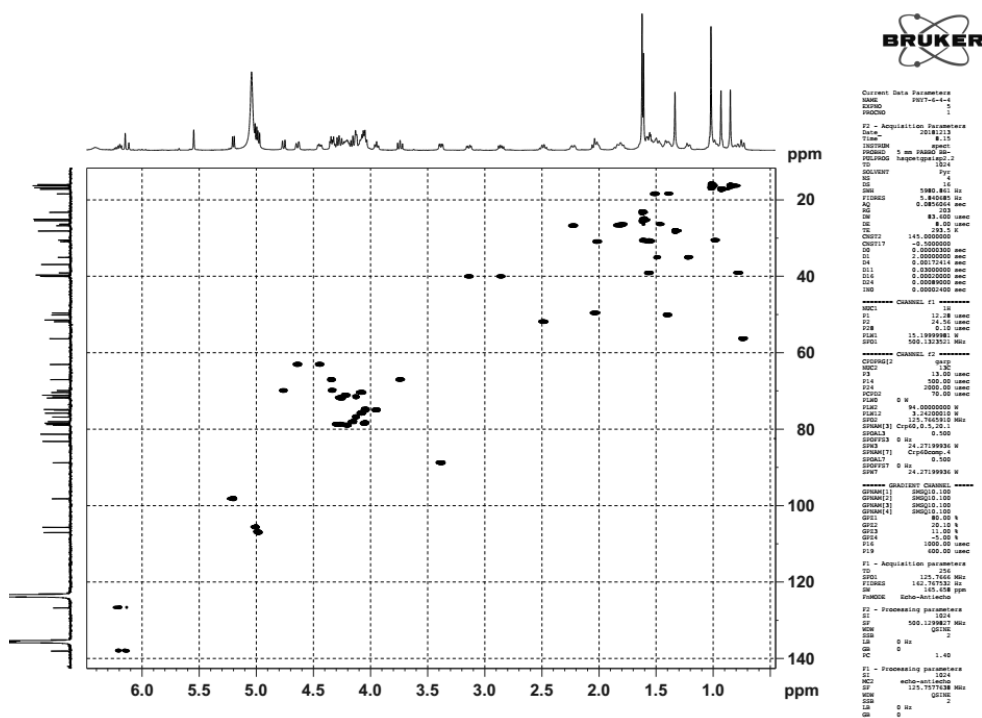

Figure S11 HSQC ( $\text{C}_5\text{D}_5\text{N}$ ) spectrum of 2

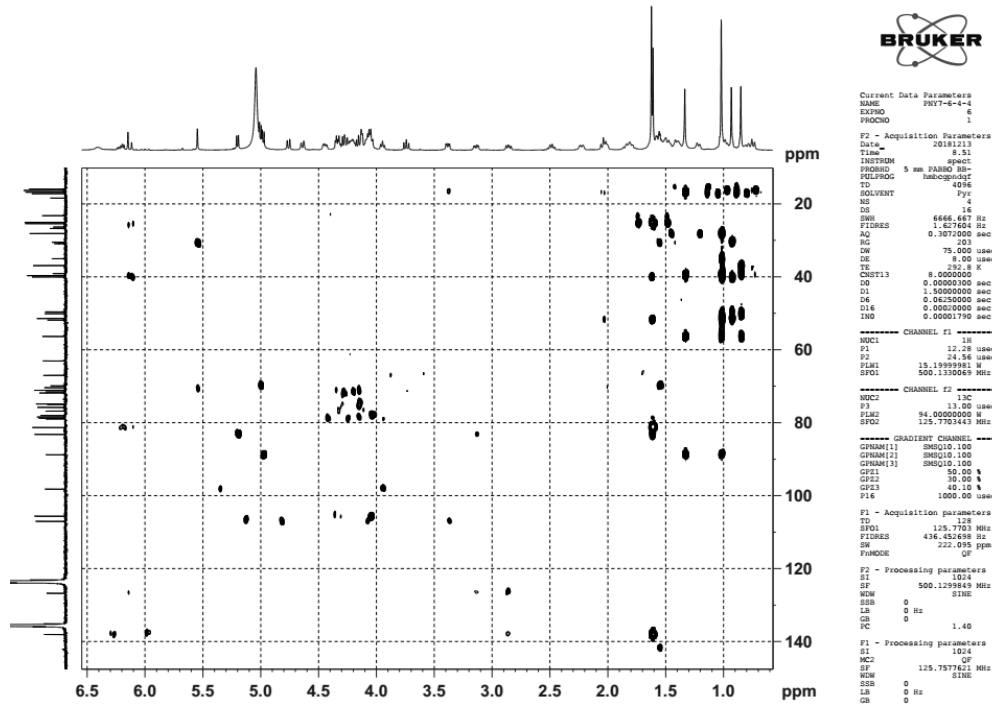

Figure S12 HMBC (C<sub>5</sub>D<sub>5</sub>N) spectrum of 2

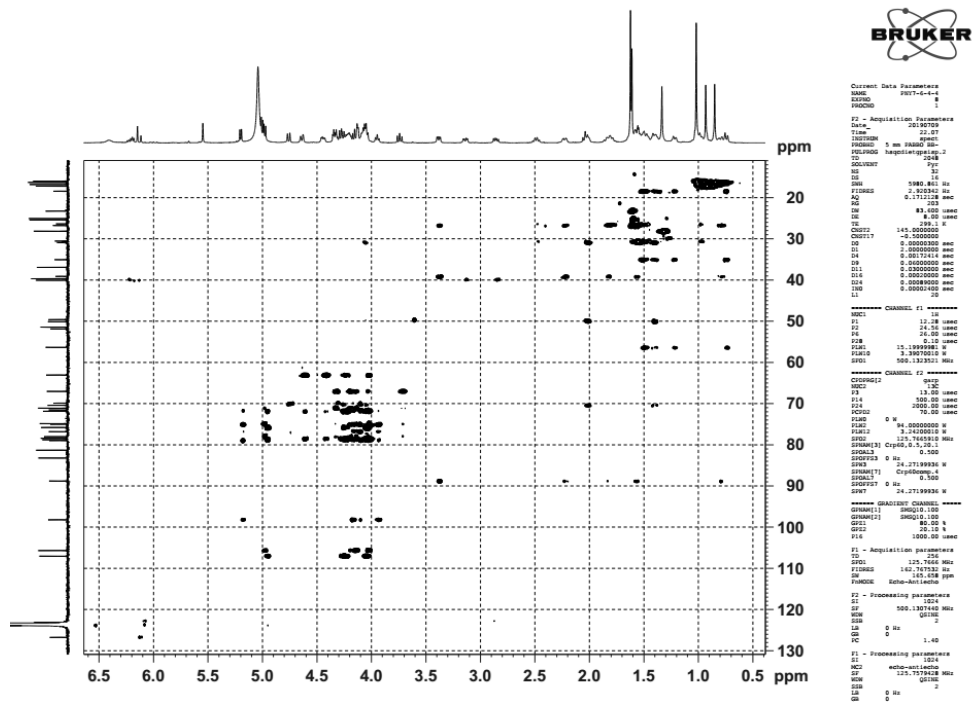

Figure S13 HSQC-TOCSY (C<sub>5</sub>D<sub>5</sub>N) spectrum of 2

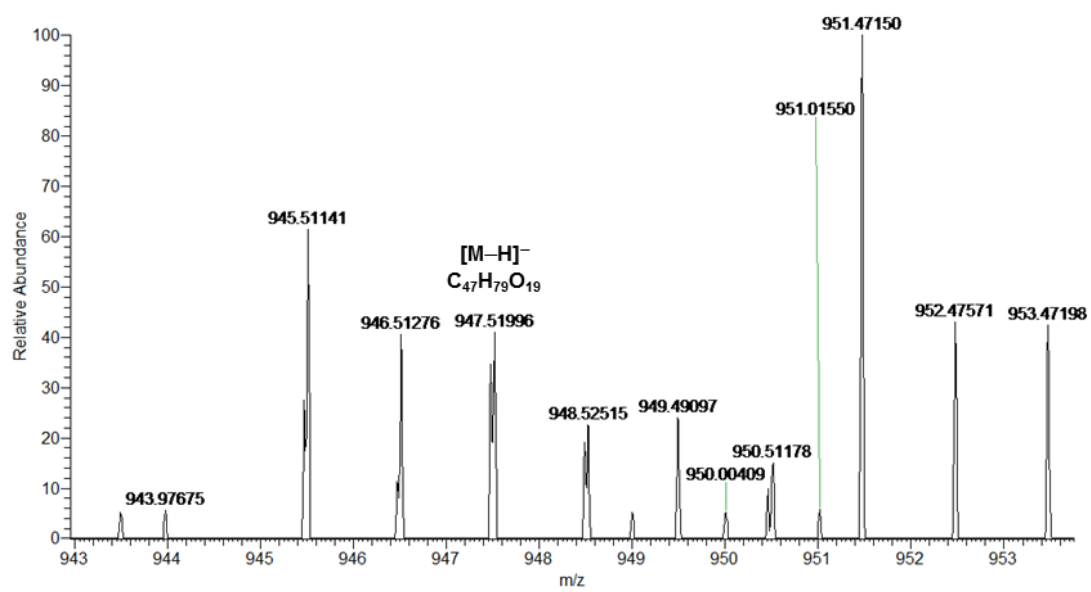

Figure S14 ESI-Q-Orbitrap-MS spectrum of 2

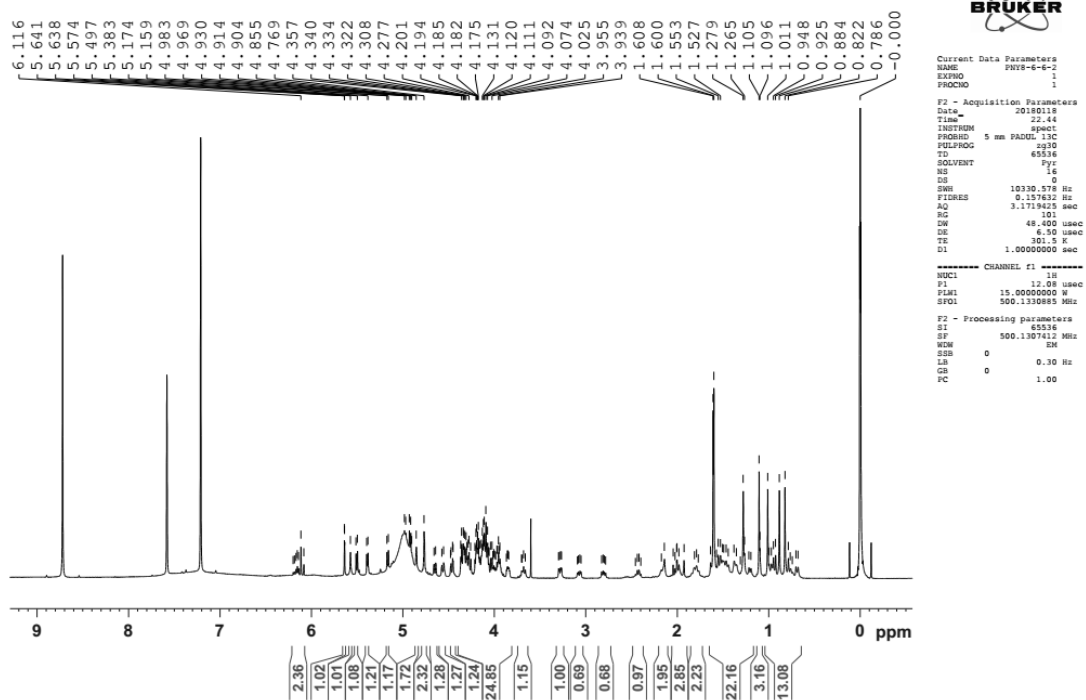

Figure S15  $^1\text{H}$  NMR (500 MHz,  $\text{C}_5\text{D}_5\text{N}$ ) spectrum of 3

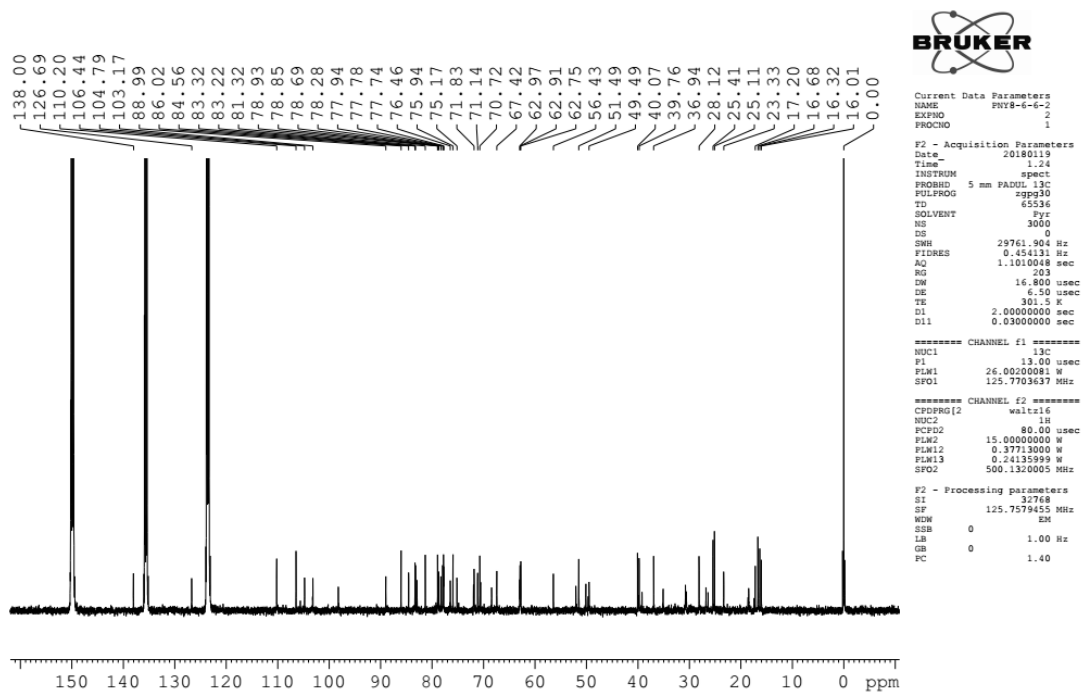

Figure S16  $^{13}\text{C}$  NMR (125 MHz,  $\text{C}_5\text{D}_5\text{N}$ ) spectrum of 3

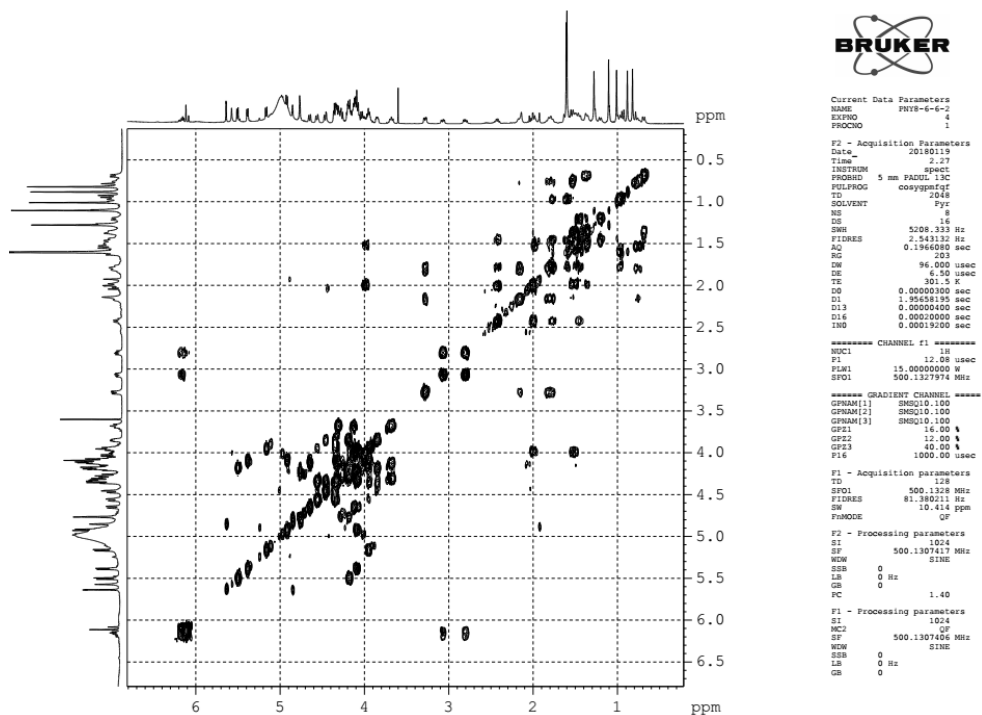

Figure S17  $^1\text{H}$   $^1\text{H}$  COSY ( $\text{C}_5\text{D}_5\text{N}$ ) spectrum of 3

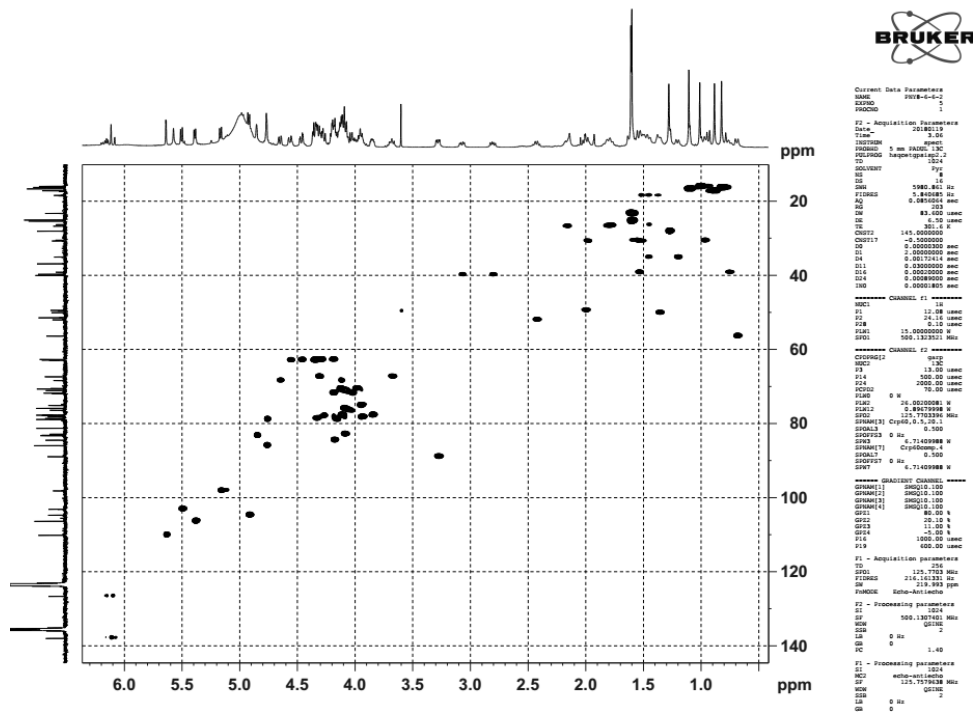

Figure S18 HSQC ( $\text{C}_5\text{D}_5\text{N}$ ) spectrum of 3

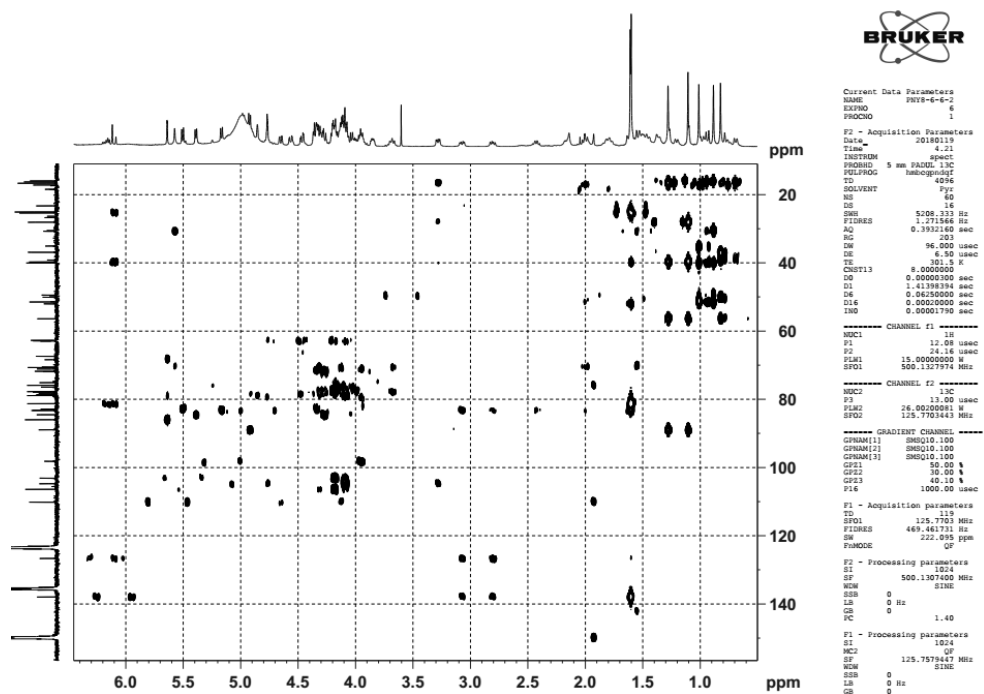

Figure S19 HMBC (C<sub>5</sub>D<sub>5</sub>N) spectrum of 3

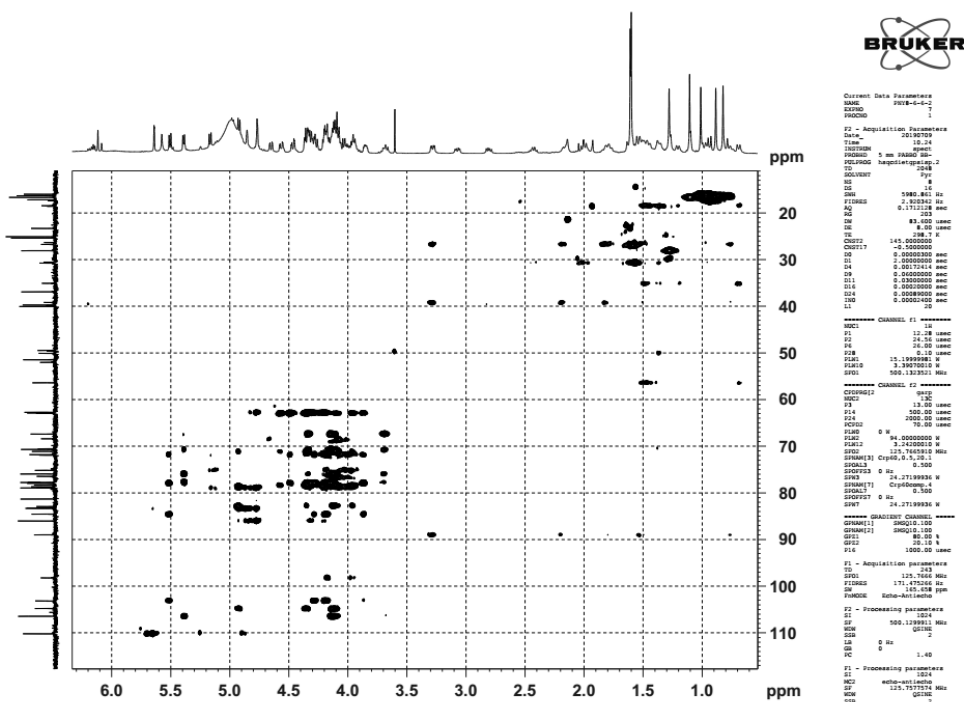

Figure S20 HSQC-TOCSY (C<sub>5</sub>D<sub>5</sub>N) spectrum of 3

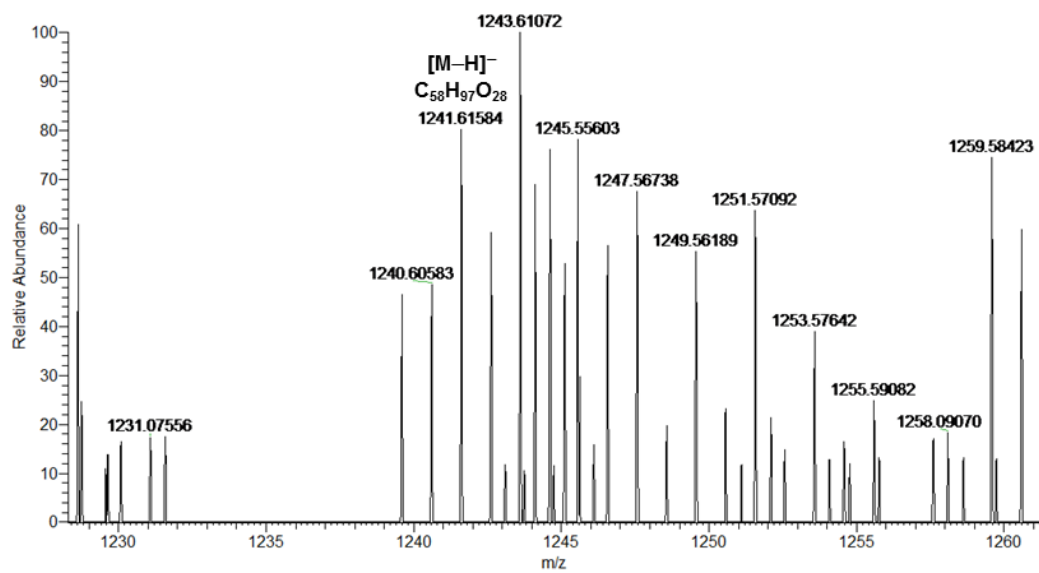

Figure S21 ESI-Q-Orbitrap-MS spectrum of 3

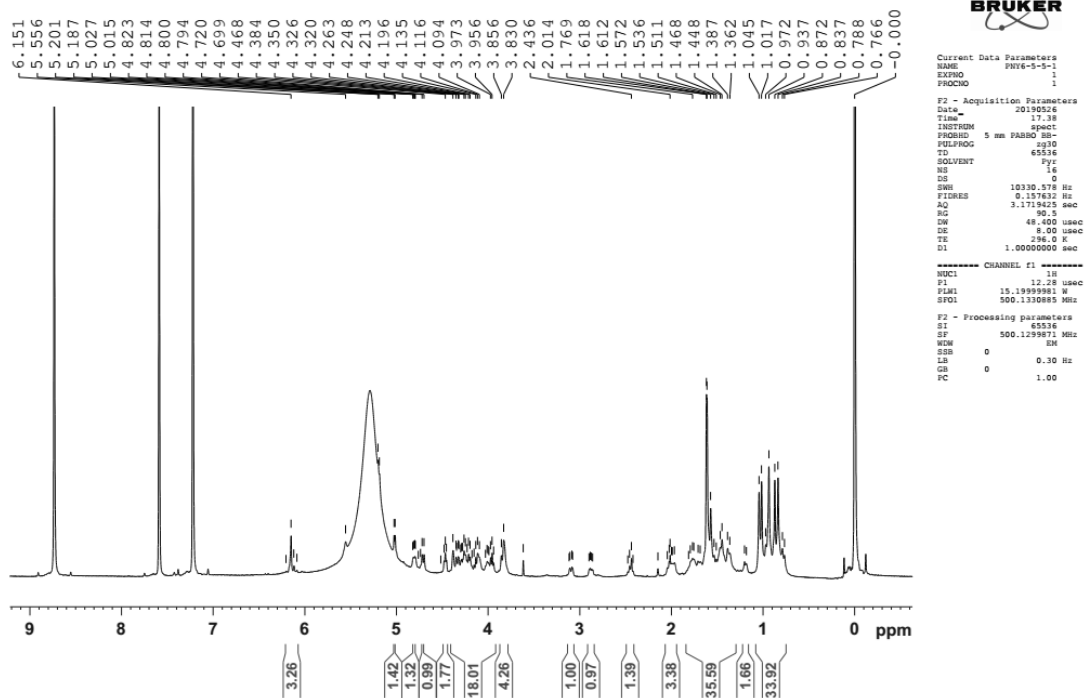

Figure S22  $^1\text{H}$  NMR (500 MHz,  $\text{C}_5\text{D}_5\text{N}$ ) spectrum of 4

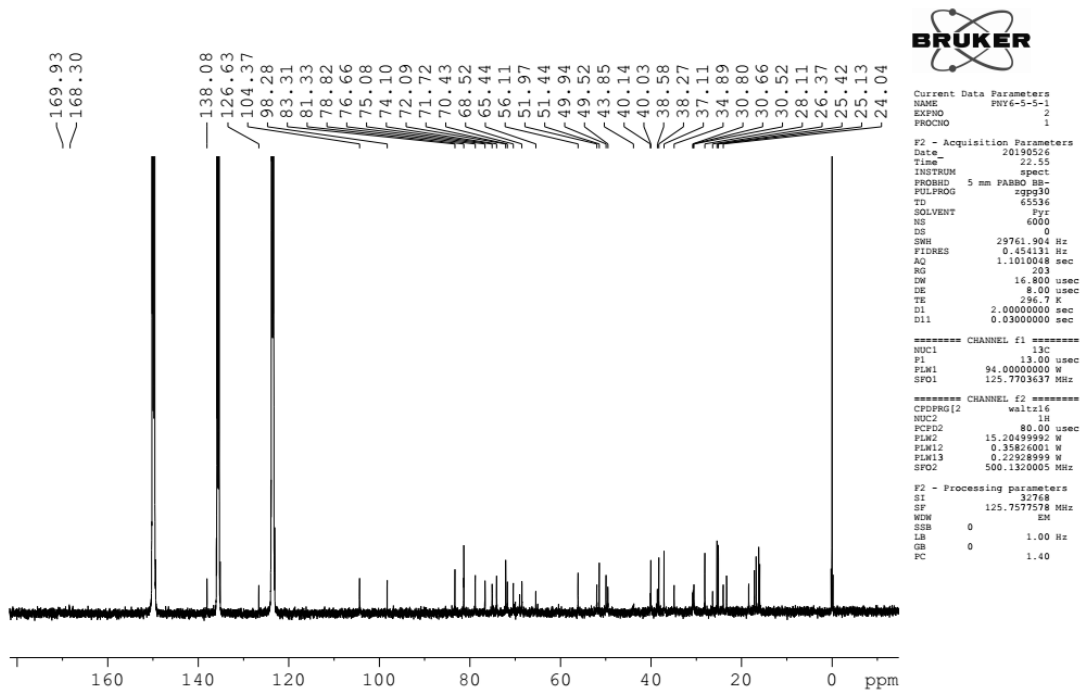

Figure S23  $^{13}\text{C}$  NMR (125 MHz,  $\text{C}_5\text{D}_5\text{N}$ ) spectrum of 4



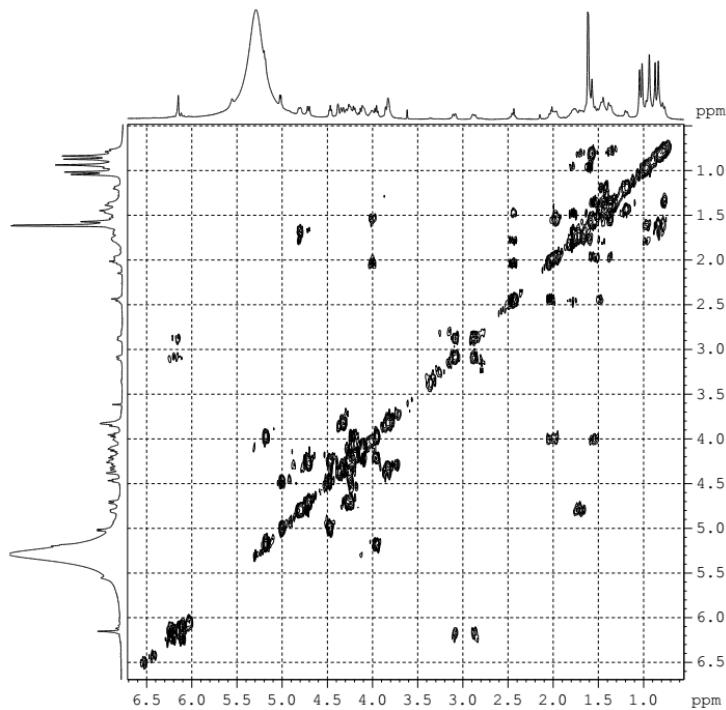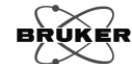

```

Current Data Parameters
NAME      PNT6-5-5-1
EXPRO    5
PROCNO    1

F2 - Acquisition Parameters
Date_    20190829
Time     10.19
INSTRUM  spect
PROBHD   5 mm PABBO BH-
PULPROG  cosyypngfj
TD       7048
SOLVENT  Pyr
NS       4
DS       16
SWH      5747.136 Hz
FIDRES   2.806214 Hz
AQ       0.1781760 sec
RG       203
WDW      87.000 usec
SSB      0
GB       0
TE       296.4 K
DQ       0.0000000 sec
D1       1.87501397 sec
D13      0.00000400 sec
D16      0.00020000 sec
RG       0.00017400 sec

===== CHANNEL f1 =====
NUC1      1H
P1        12.28 usec
PC1       15.1999981 Hz
SFO1      500.1320223 MHz

===== GRADIENT CHANNEL =====
GPM1[1]  SHGQ10.100
GPM1[2]  SHGQ10.100
GPM1[3]  SHGQ10.100
GPF1     16.00 %
GPF2     12.00 %
GPF3     40.00 %
PI6      1000.00 usec

F1 - Acquisition Parameters
TD        128
SFO1      500.132 MHz
FIDRES    87.798851 Hz
SW        11.491 ppm
FUNDCO    CF

F2 - Processing parameters
SI        1024
SF        500.1299984 MHz
WDW       SINE
SSB       0 Hz
LB        0
GB        0
PC        1.40

F1 - Processing parameters
SI        1024
MC2       CF
SF        500.1299984 MHz
WDW       SINE
SSB       0 Hz
LB        0
GB        0

```

Figure S24  $^1\text{H}$   $^1\text{H}$  COSY ( $\text{C}_5\text{D}_5\text{N}$ ) spectrum of 4

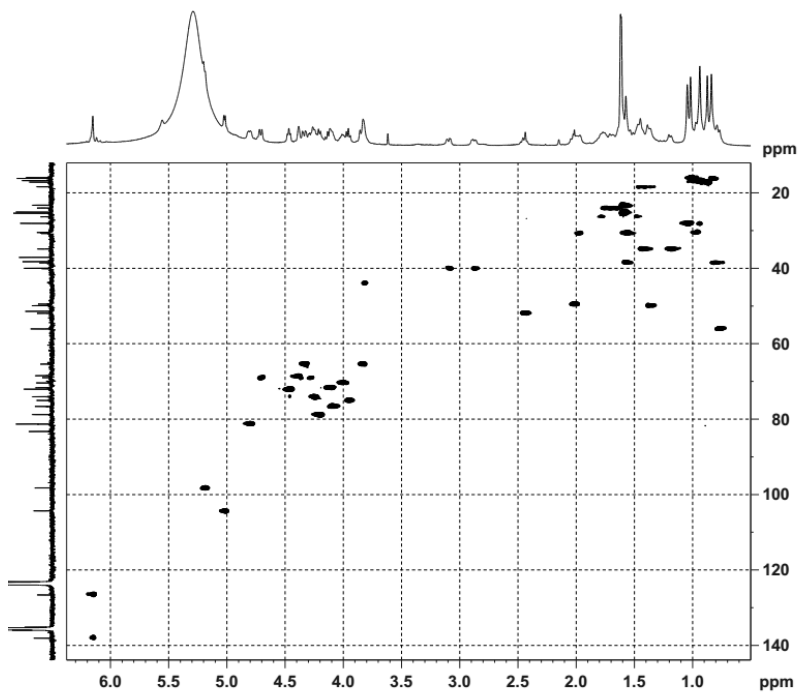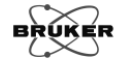

```

Current Data Parameters
NAME      PNT6-5-5-1
EXPRO    3
PROCNO    1

F2 - Acquisition Parameters
Date_    20190826
Time     22.57
INSTRUM  spect
PROBHD   5 mm PABBO BH-
PULPROG  hsqcetgpa1
TD       1024
SOLVENT  Pyr
NS       4
DS       16
SWH      5319.149 Hz
FIDRES   5.194461 Hz
AQ       0.0962560 sec
RG       203
WDW      94.000 usec
SSB      0
GB       0
TE       296.4 K
DQ       0.0000000 sec
D1       1.44023505 sec
D13      0.00172414 sec
D16      0.01000000 sec
D19      0.00000400 sec
D24      0.00010000 sec
RG       0.00014000 sec

===== CHANNEL f1 =====
NUC1      1H
P1        12.28 usec
PC1       15.1999981 Hz
SFO1      500.1320225 MHz

===== CHANNEL f2 =====
CPDPRG2  9azp
MC2       13C
P2        13.00 usec
P4        26.00 usec
PCPD2    70.00 usec
PAP2     94.0000000 Hz
PAP12    3.2420000 Hz
SFO2     125.7671642 MHz

===== GRADIENT CHANNEL =====
GPM1[1]  SHGQ10.100
GPM1[2]  SHGQ10.100
GPM1[3]  SHGQ10.100
GPF1     80.00 %
GPF2     20.00 %
PI6      1000.00 usec

F1 - Acquisition Parameters
TD        256
SFO1      125.7672 MHz
FIDRES    162.749847 Hz
SW        145.439 ppm
FUNDCO    Echo-AntiEcho

F2 - Processing parameters
SI        1024
SF        500.1299989 MHz
WDW       QFTINE
SSB       0 Hz
LB        2
GB        0
PC        1.40

F1 - Processing parameters
SI        1024
MC2       echo-antiecho
SF        125.7671642 MHz
WDW       SINE
SSB       0 Hz
LB        2
GB        0

```

Figure S25 HSQC ( $\text{C}_5\text{D}_5\text{N}$ ) spectrum of 4

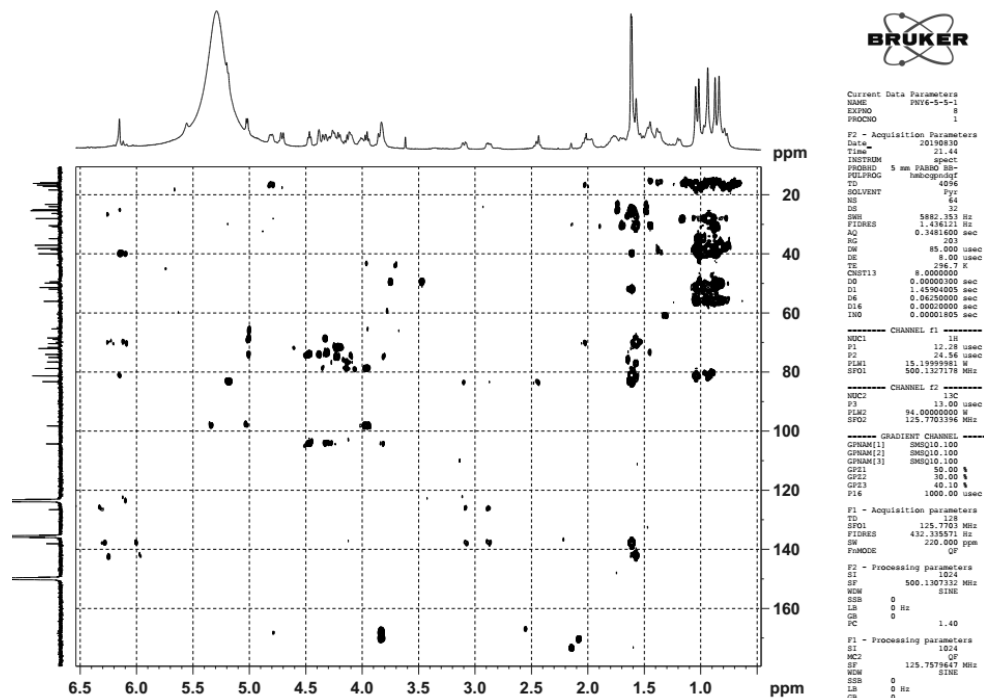

Figure S26 HMBC (C<sub>5</sub>D<sub>5</sub>N) spectrum of 4

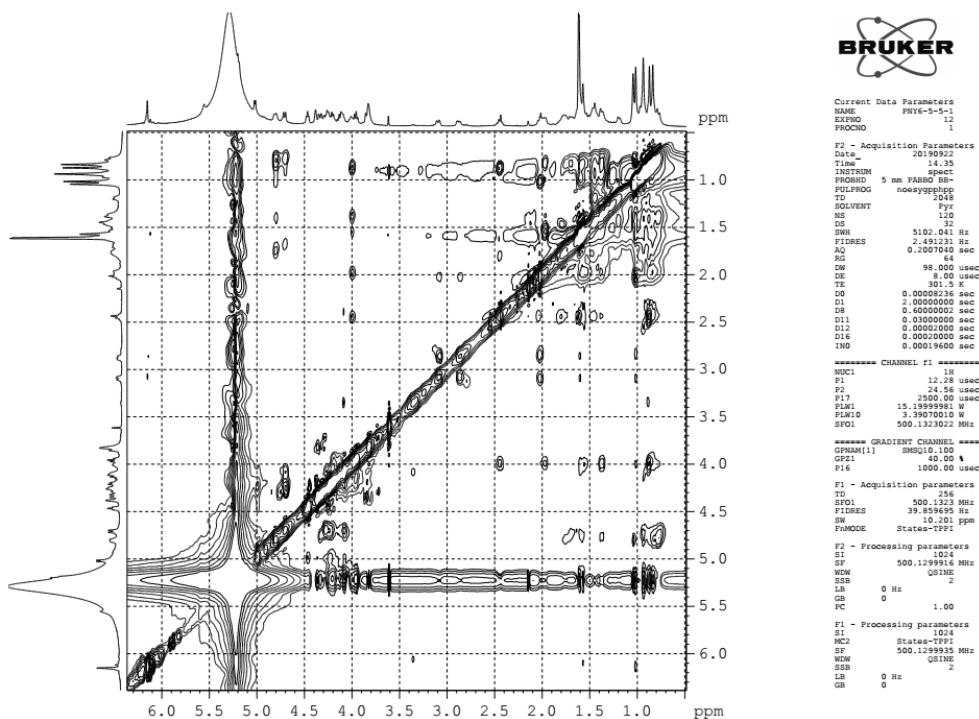

Figure S27 NOSEY (C<sub>5</sub>D<sub>5</sub>N) spectrum of 4

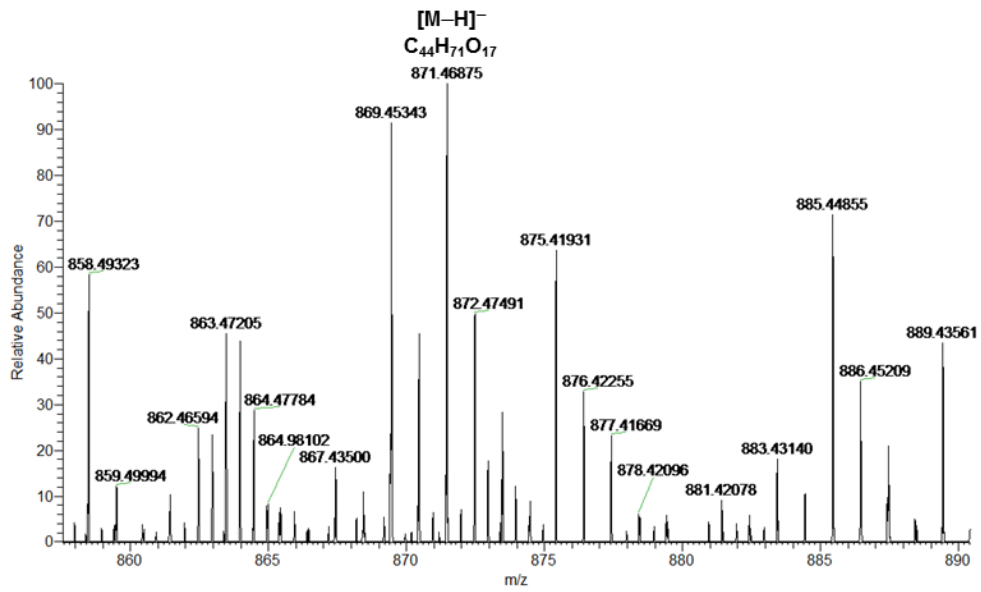

Figure S28 ESI-Q-Orbitrap-MS spectrum of 4

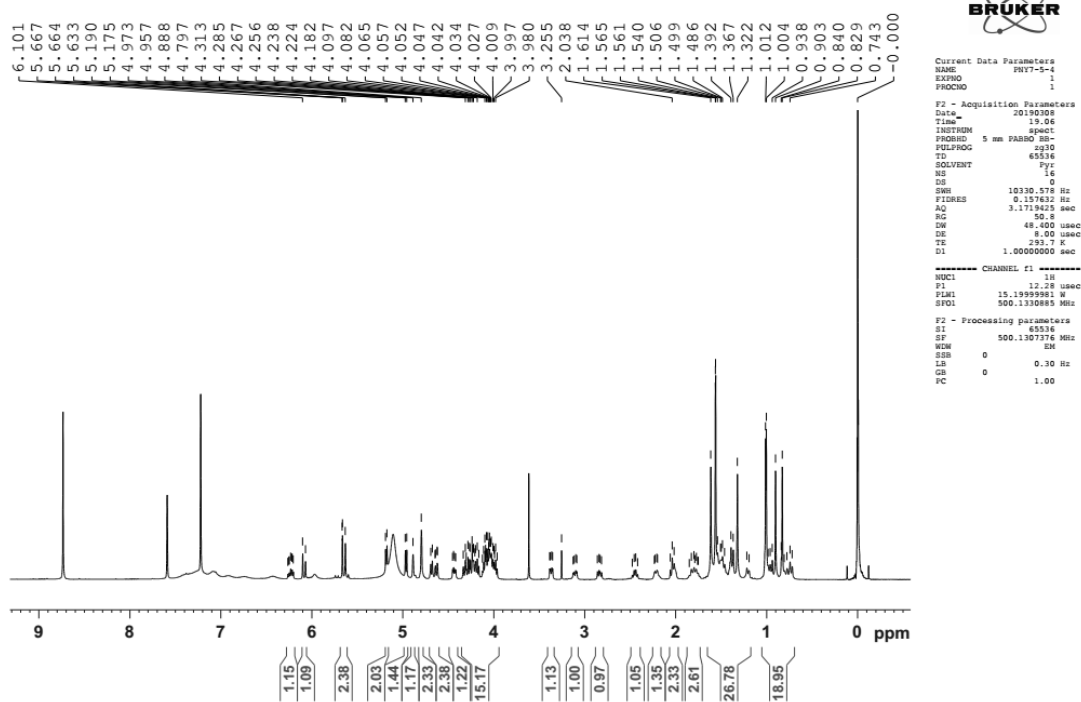

Figure S29  $^1\text{H}$  NMR (500 MHz,  $\text{C}_5\text{D}_5\text{N}$ ) spectrum of 5

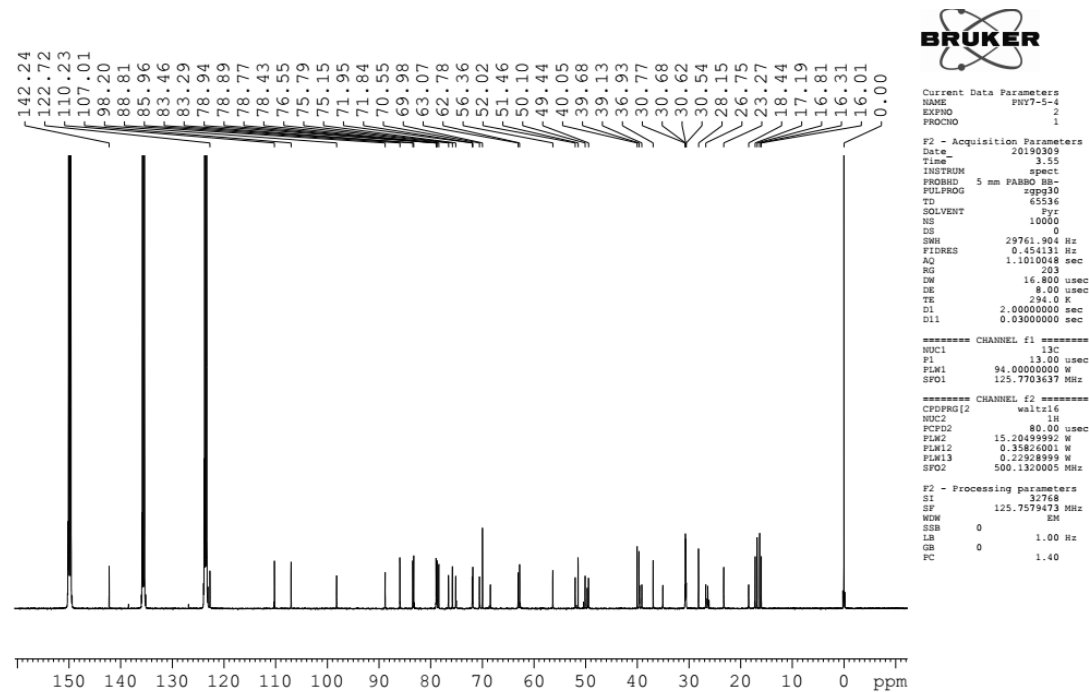

Figure S30  $^{13}\text{C}$  NMR (125 MHz,  $\text{C}_5\text{D}_5\text{N}$ ) spectrum of 5

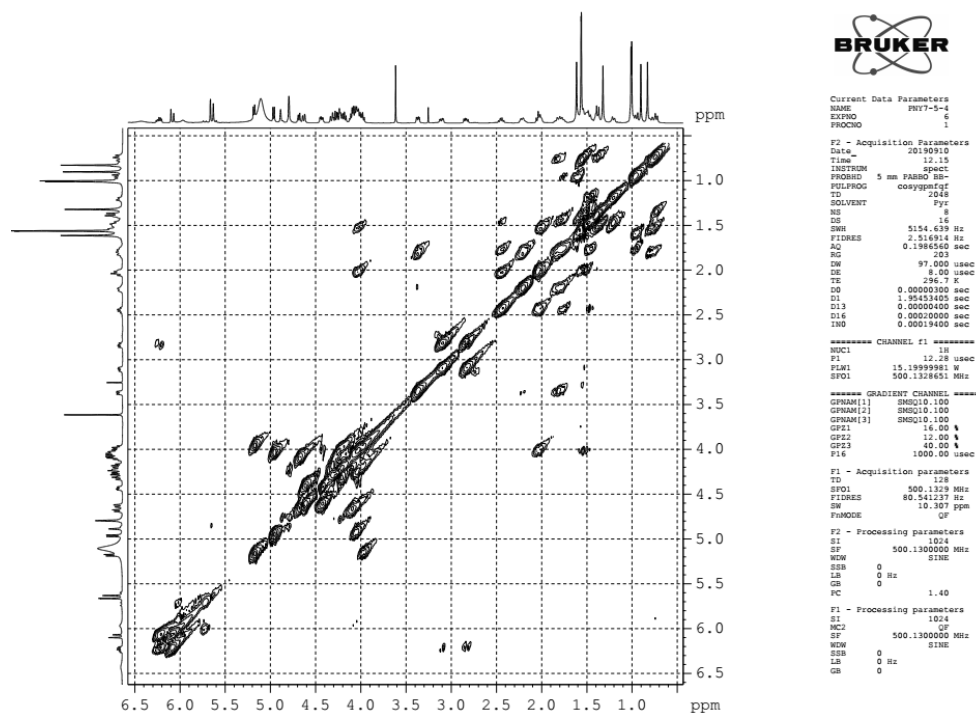

Figure S31  $^1\text{H}$   $^1\text{H}$  COSY ( $\text{C}_5\text{D}_5\text{N}$ ) spectrum of 5

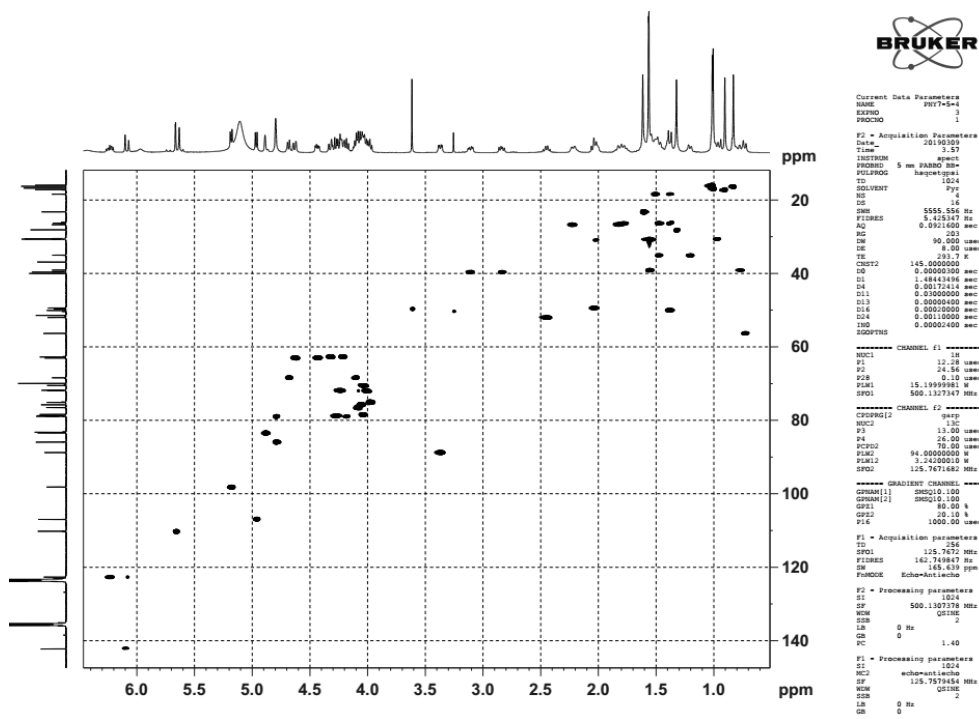

Figure S32 HSQC ( $\text{C}_5\text{D}_5\text{N}$ ) spectrum of 5

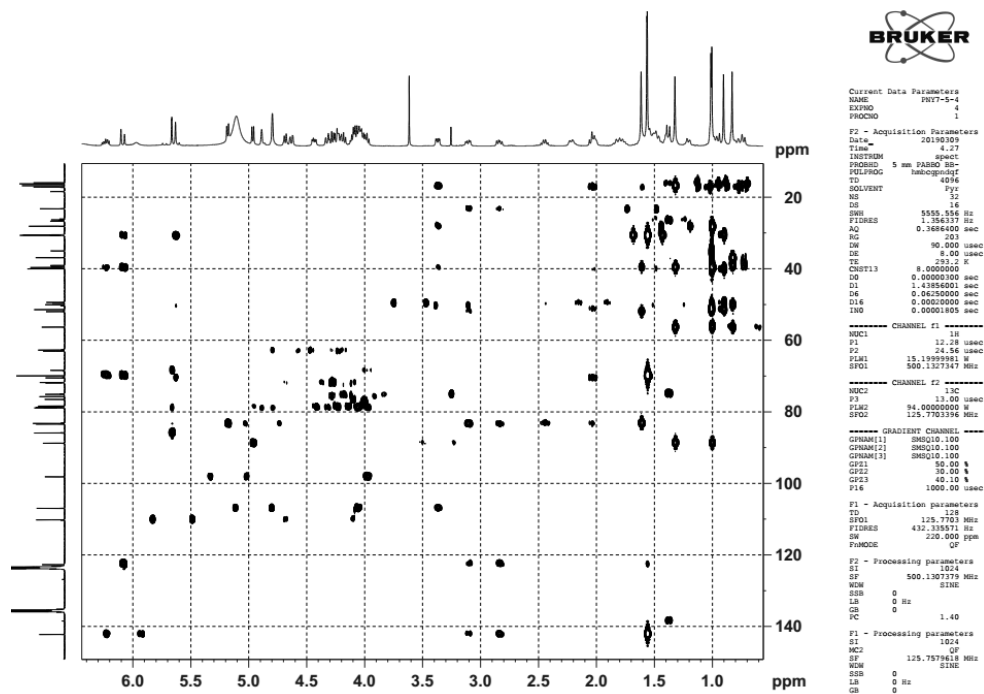

Figure S33 HMBC (C<sub>5</sub>D<sub>5</sub>N) spectrum of 5

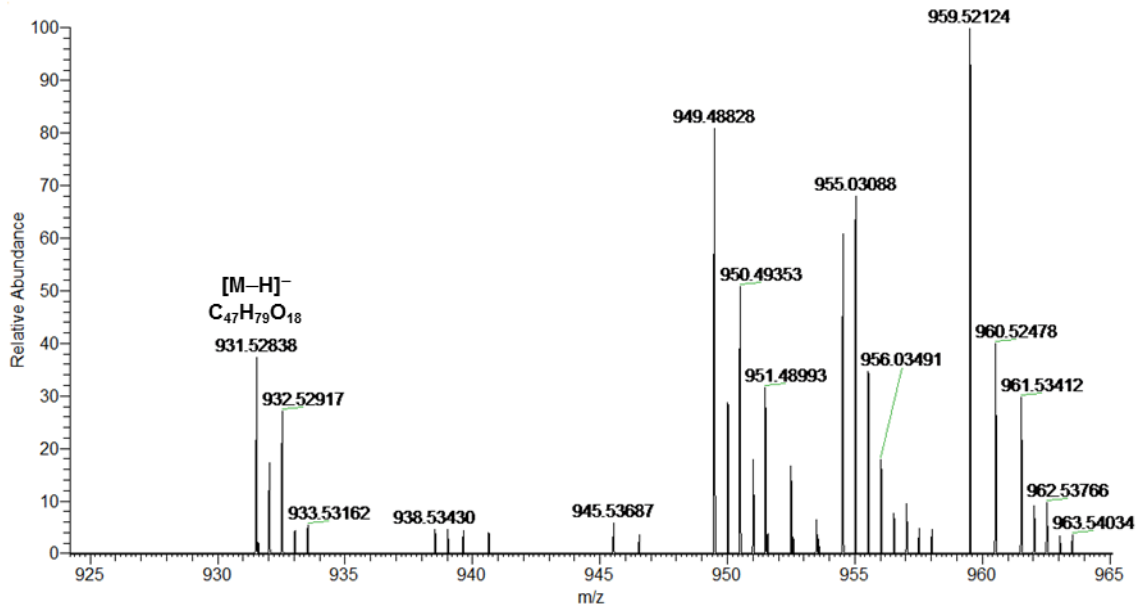

Figure S34 ESI-Q-Orbitrap-MS spectrum of 5

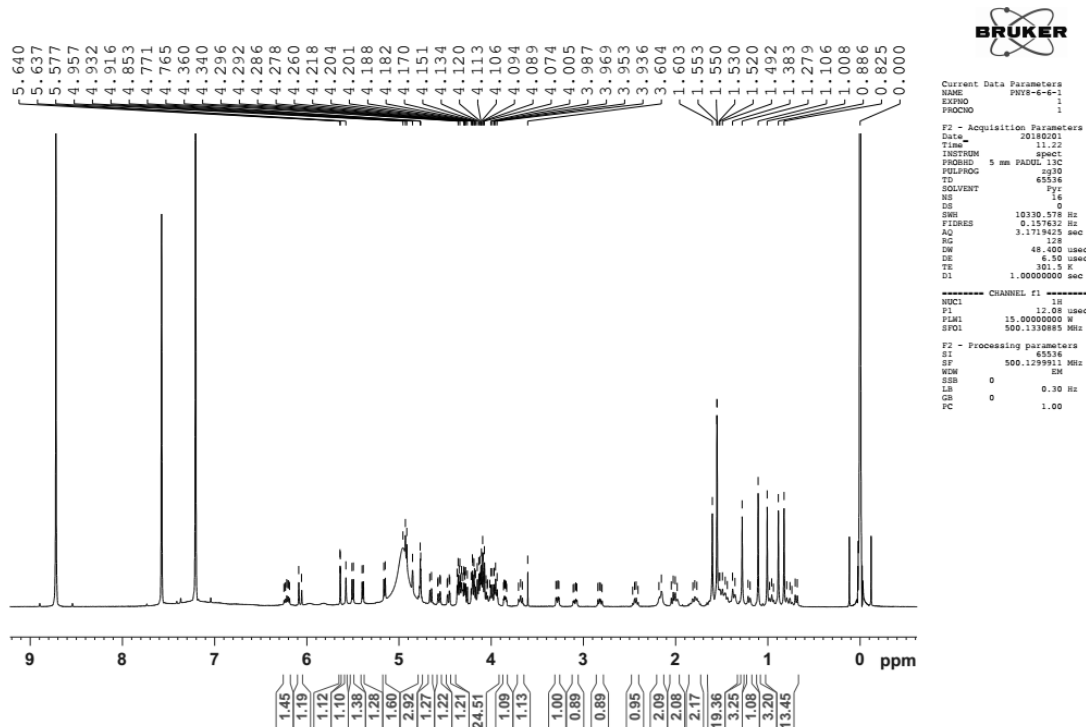

Figure S35  $^1\text{H}$  NMR (500 MHz,  $\text{C}_5\text{D}_5\text{N}$ ) spectrum of 6

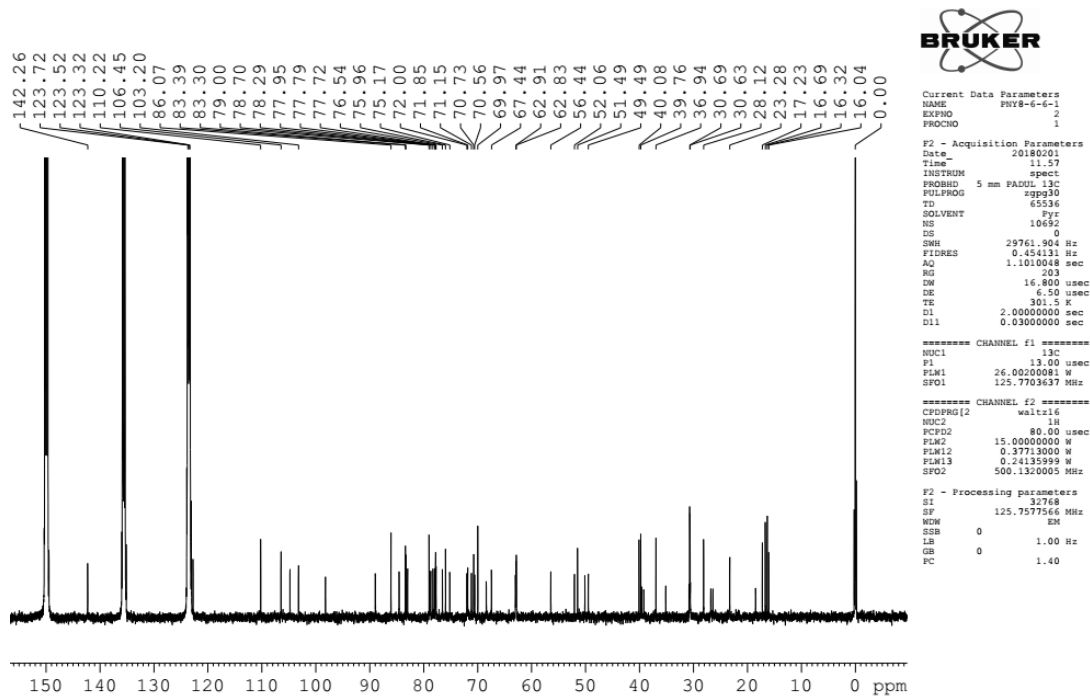

Figure S36  $^{13}\text{C}$  NMR (125 MHz,  $\text{C}_5\text{D}_5\text{N}$ ) spectrum of 6

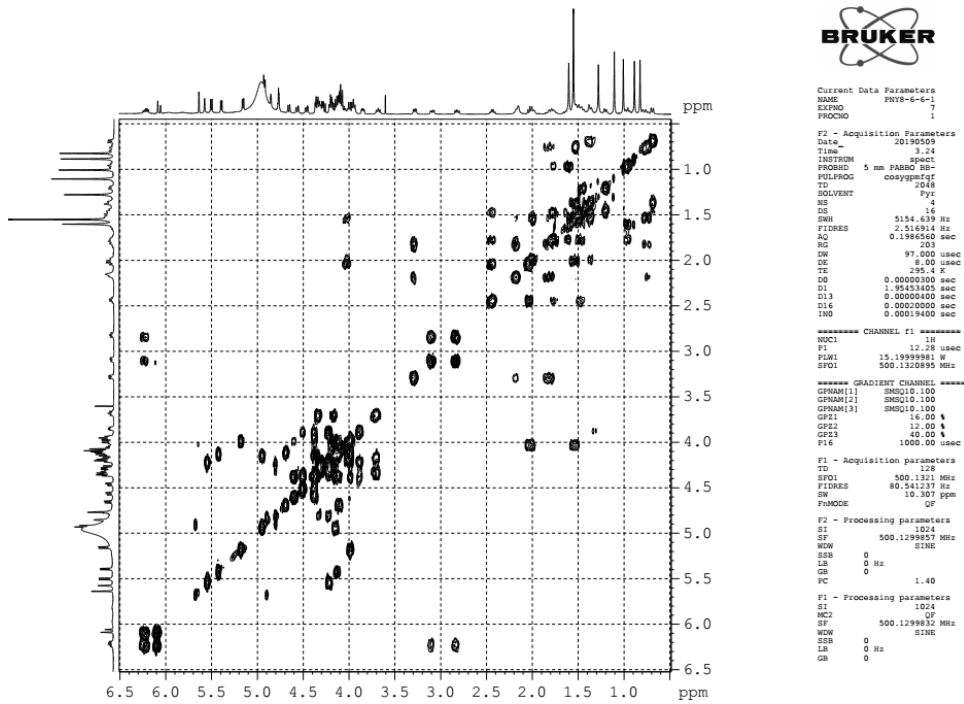

Figure S37  $^1\text{H}$ - $^1\text{H}$  COSY ( $\text{C}_5\text{D}_5\text{N}$ ) spectrum of 6

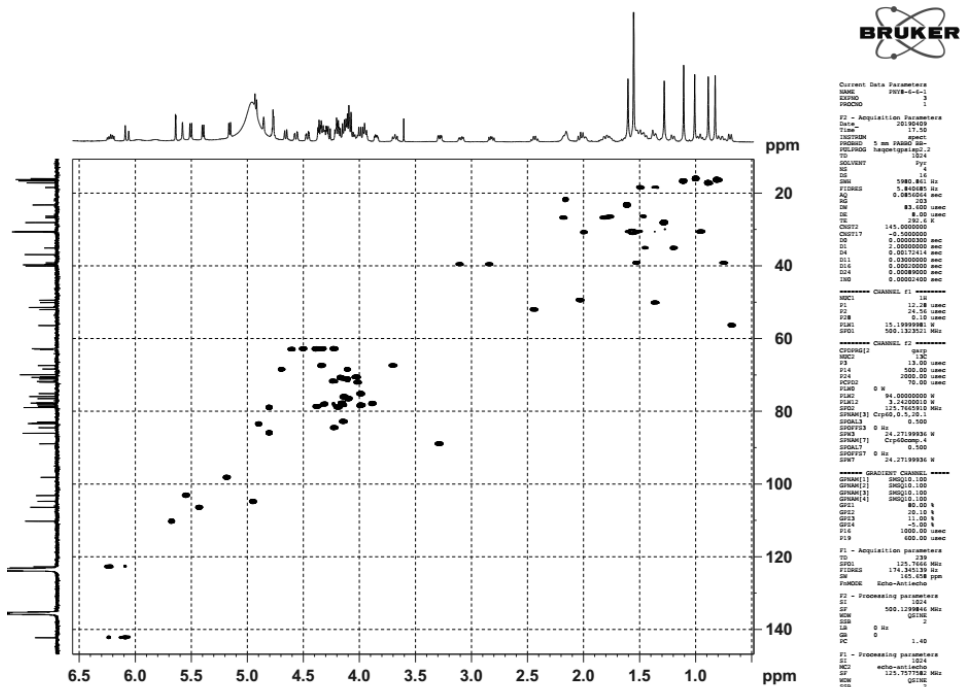

Figure S38 HSQC ( $\text{C}_5\text{D}_5\text{N}$ ) spectrum of 6



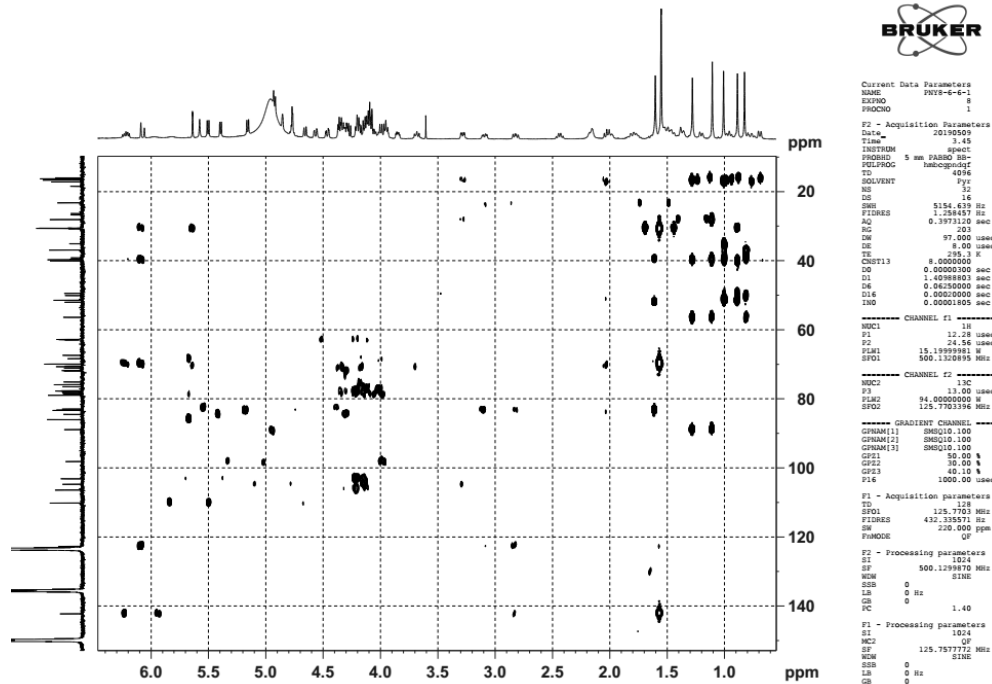

Figure S39 HMBC (C<sub>5</sub>D<sub>5</sub>N) spectrum of 6

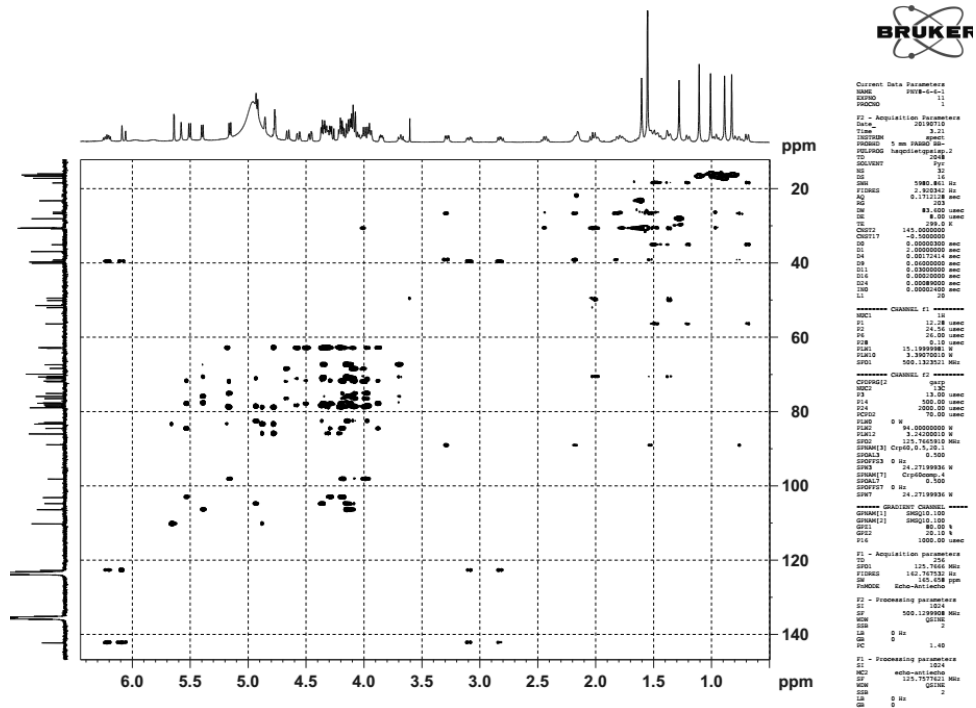

Figure S40 HSQC-TOCSY (C<sub>5</sub>D<sub>5</sub>N) spectrum of 6

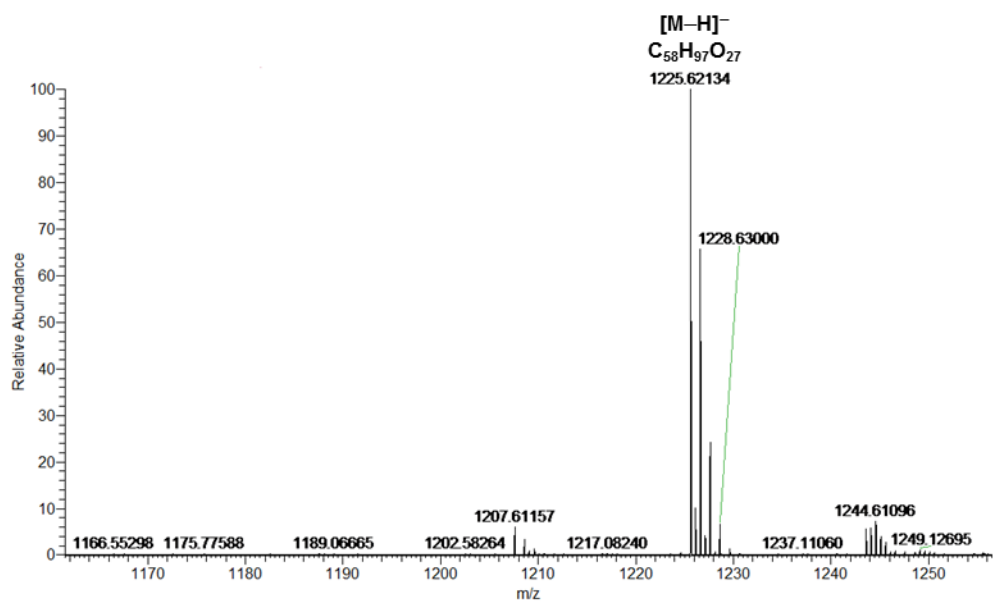

Figure S41 ESI-Q-Orbitrap-MS spectrum of 6

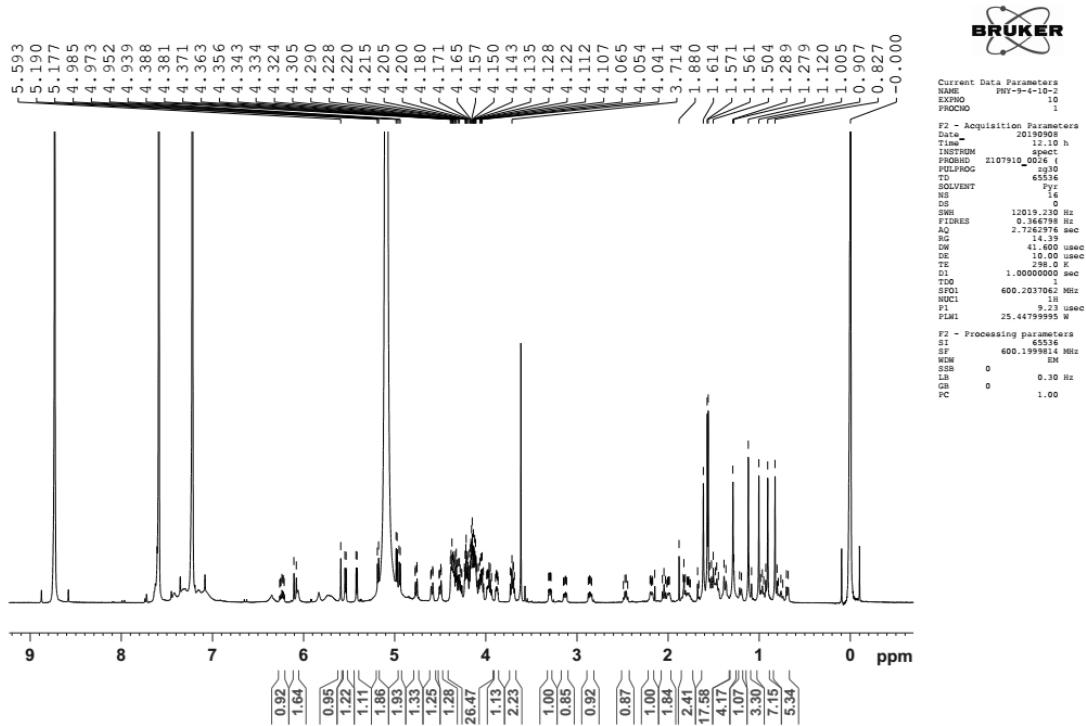

Figure S42 <sup>1</sup>H NMR (600 MHz, C<sub>5</sub>D<sub>5</sub>N) spectrum of 7

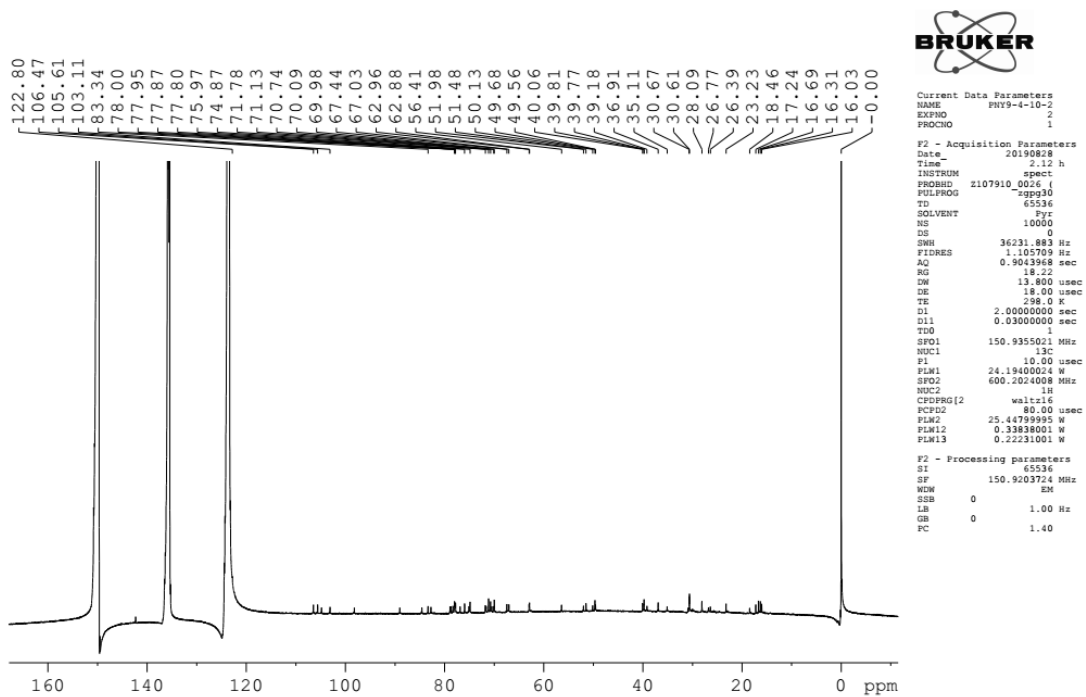

Figure S43 <sup>13</sup>C NMR (150 MHz, C<sub>5</sub>D<sub>5</sub>N) spectrum of 7

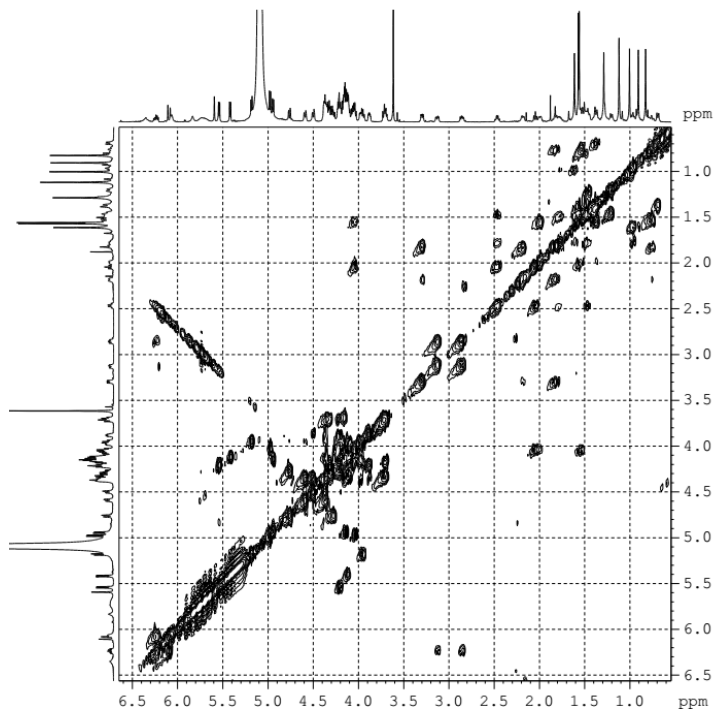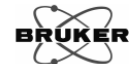

```

Current Data Parameters
NAME          PRY9-4-10-2
EXPNO        11
PROCNO       1

F2 - Acquisition Parameters
Date_        20190901
Time         11:26 h
INSTRUM      spect
PROBHD       z107910 003.6
PULPROG      cosyppmgf
TD           2048
SOLVENT      Py
NS           8
DS           16
SWH          7142.857 Hz
FIDRES      6.975466 Hz
AQ           0.1433600 sec
RG           188.54
DM           70.000 usec
DE           10.00 usec
TE           298.0 K
D0           0.0000000 sec
D1           1.9871203 sec
D13         0.0000400 sec
D16         0.0001000 sec
IND         0.00014000 sec
TNAV        1
SFO1         600.2026011 MHz
NUC1         13C
P1           9.23 usec
P161         25.4479995 W
GPHAS1[1]   SMSG10.100
GPE1        16.00 %
GPHAS1[2]   SMSG10.100
GPE2        12.00 %
GPHAS1[3]   SMSG10.100
GPE3        40.00 %
P16         1000.00 usec

F1 - Acquisition parameters
TD           28
SFO1         600.2026 MHz
FIDRES      111.407140 Hz
SW          11.901 ppm
FWDK        OF

F2 - Processing parameters
SI           1024
SF           600.1999628 MHz
WDW          SINE
SSB          0
LB           0 Hz
GB           0
PC           1.40

F1 - Processing parameters
SI           1024
SF           600.1999628 MHz
WDW          SINE
SSB          0
LB           0 Hz
GB           0
  
```

Figure S44  $^1\text{H}$   $^1\text{H}$  COSY ( $\text{C}_5\text{D}_5\text{N}$ ) spectrum of 7

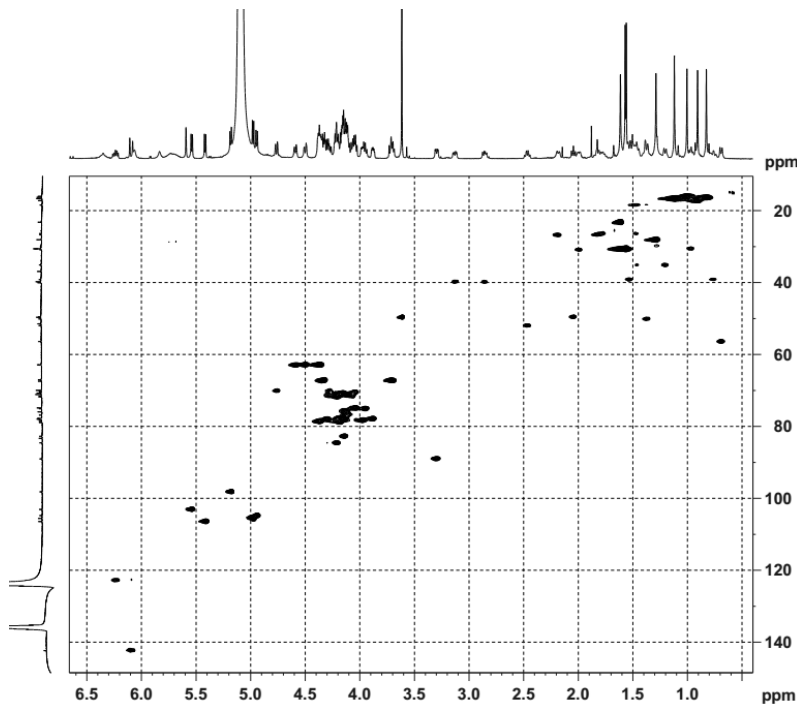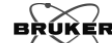

```

Current Data Parameters
NAME          PRY9-4-10-2
EXPNO        1
PROCNO       1

F2 - Acquisition Parameters
Date_        20190901
Time         2:40 h
INSTRUM      spect
PROBHD       z107910 003.6
PULPROG      hsqc
TD           2048
SOLVENT      Py
NS           8
DS           16
SWH          7812.500 Hz
FIDRES      7.529395 Hz
AQ           0.1318720 sec
RG           188.54
DM           64.000 usec
DE           10.00 usec
TE           298.0 K
D0           0.0000000 sec
D1           1.9871203 sec
D13         0.0000400 sec
D16         0.0001000 sec
IND         0.00014000 sec
TNAV        1
SFO1         600.2026011 MHz
NUC1         13C
P1           9.23 usec
P161         25.4479995 W
GPHAS1[1]   SMSG10.100
GPE1        16.00 %
GPHAS1[2]   SMSG10.100
GPE2        12.00 %
GPHAS1[3]   SMSG10.100
GPE3        40.00 %
P16         1000.00 usec

F1 - Acquisition parameters
TD           28
SFO1         600.2026 MHz
FIDRES      111.407140 Hz
SW          11.901 ppm
FWDK        OF

F2 - Processing parameters
SI           1024
SF           600.1999628 MHz
WDW          SINE
SSB          0
LB           0 Hz
GB           0
PC           1.40

F1 - Processing parameters
SI           1024
SF           600.1999628 MHz
WDW          SINE
SSB          0
LB           0 Hz
GB           0
  
```

Figure S45 HSQC ( $\text{C}_5\text{D}_5\text{N}$ ) spectrum of 7

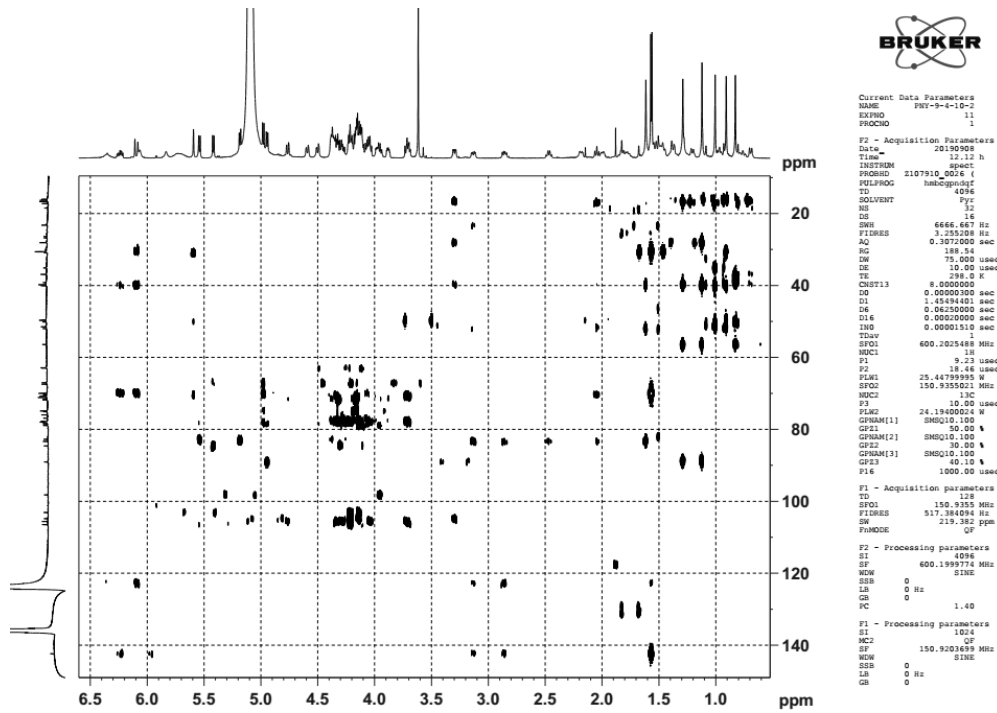

Figure S46 HMBC (C<sub>5</sub>D<sub>5</sub>N) spectrum of 7

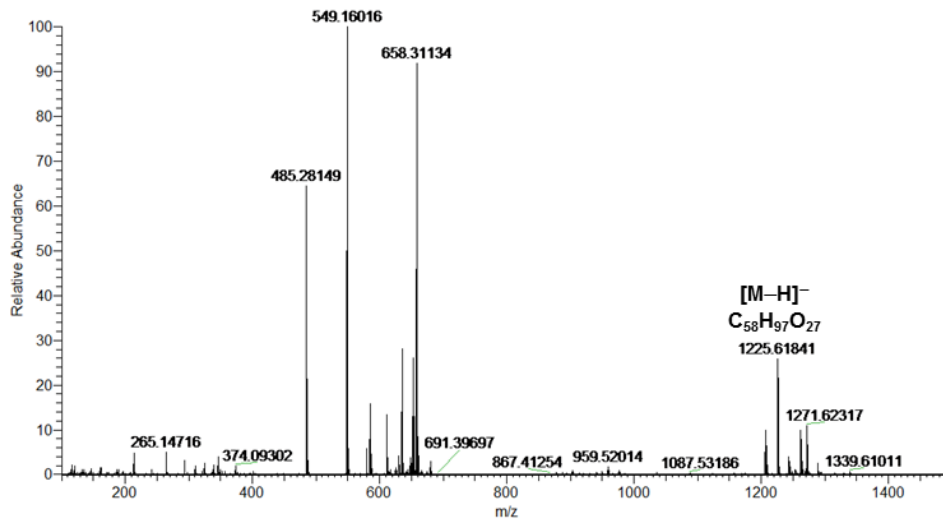

Figure S47 ESI-Q-Orbitrap-MS spectrum of 7

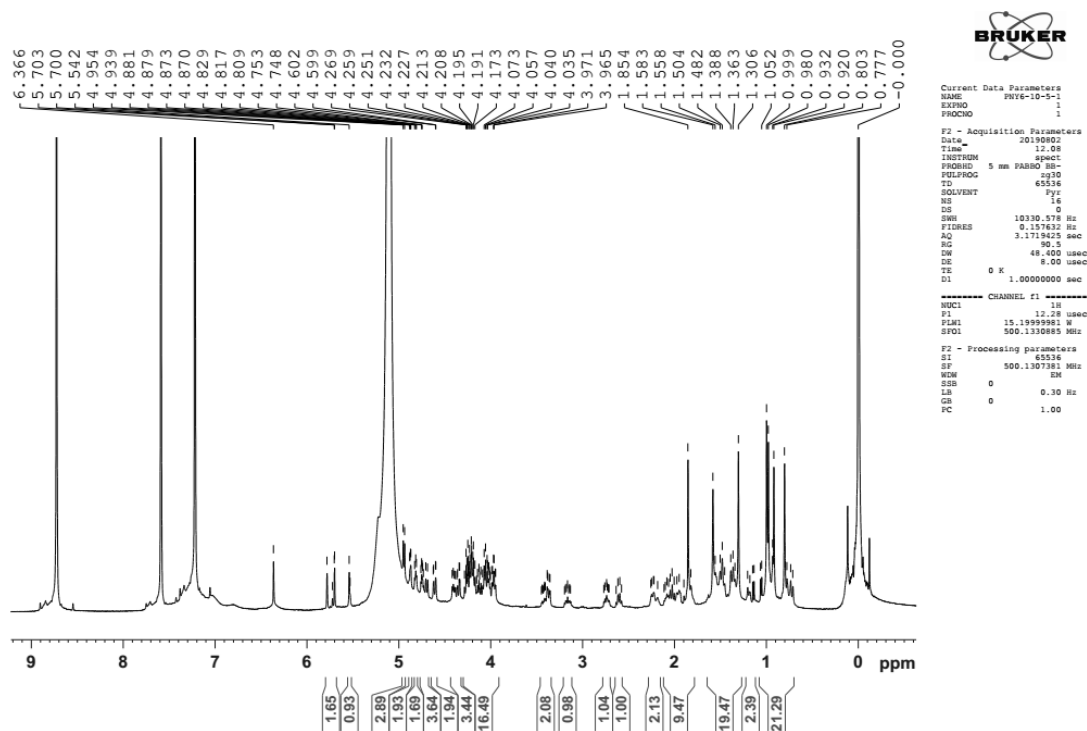

Figure S48 <sup>1</sup>H NMR (500 MHz, C<sub>5</sub>D<sub>5</sub>N) spectrum of 8

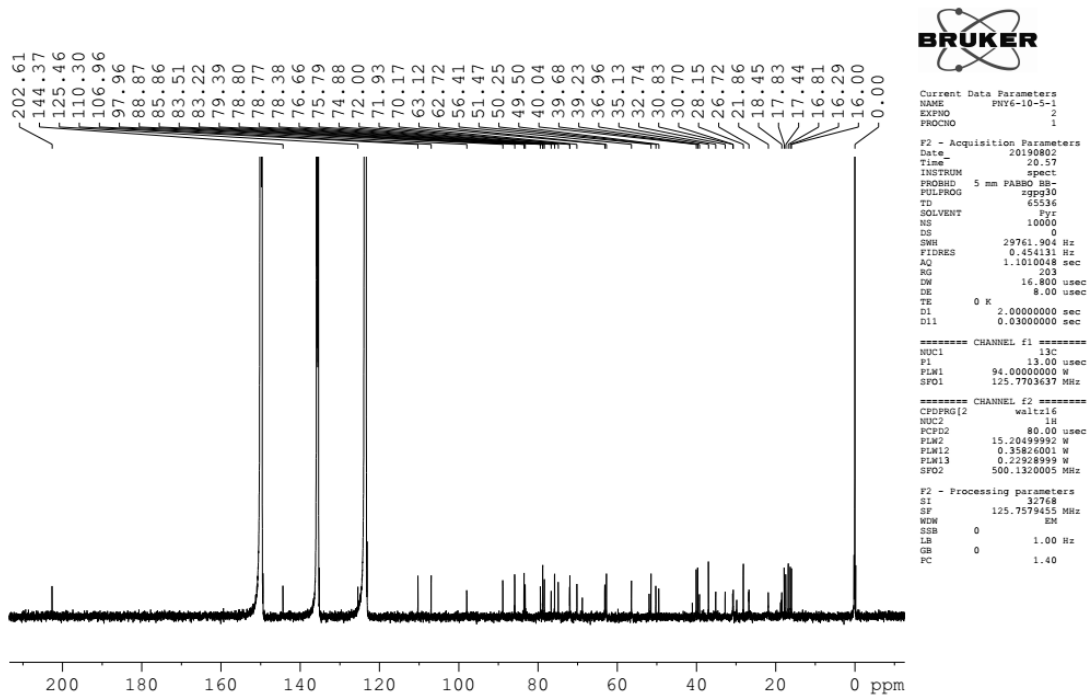

Figure S49 <sup>13</sup>C NMR (125 MHz, C<sub>5</sub>D<sub>5</sub>N) spectrum of 8

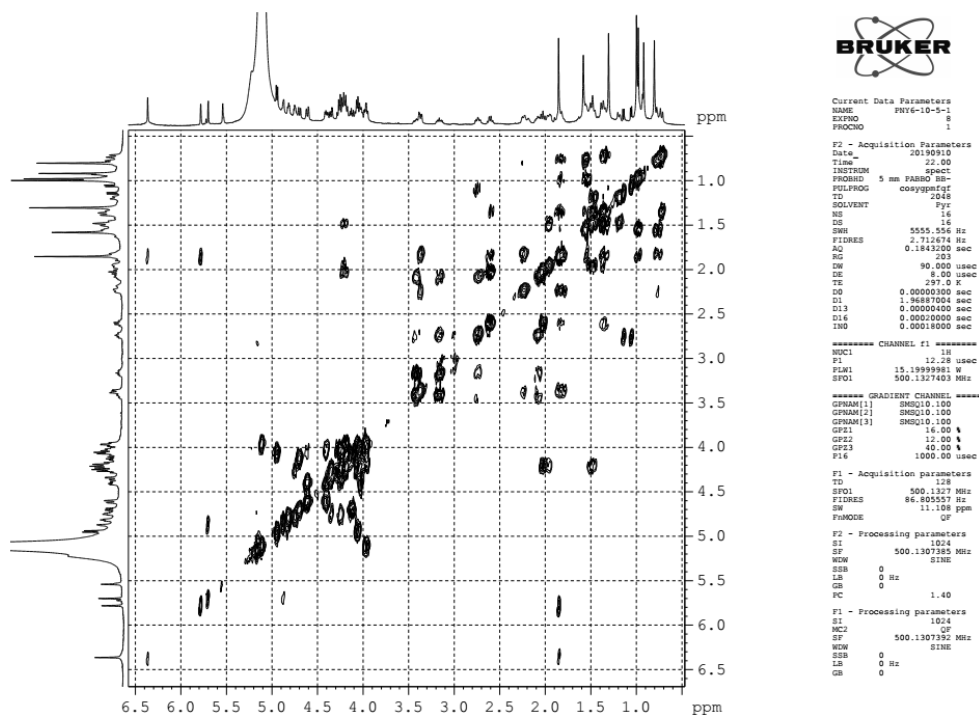

Figure S50  $^1\text{H}$   $^1\text{H}$  COSY ( $\text{C}_5\text{D}_5\text{N}$ ) spectrum of 8

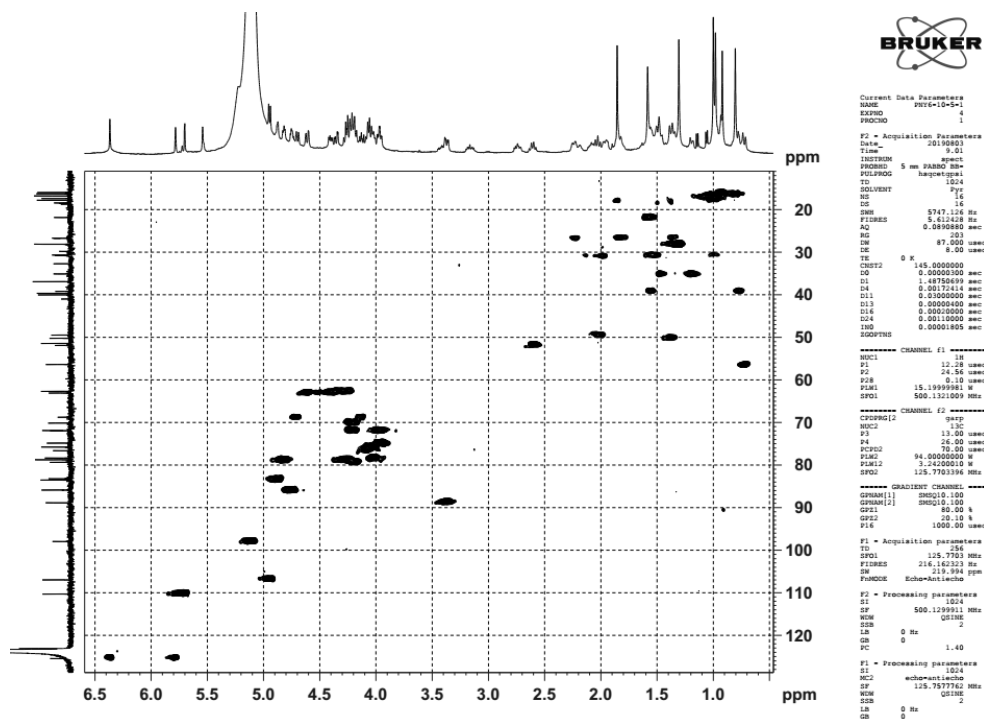

Figure S51 HSQC ( $\text{C}_5\text{D}_5\text{N}$ ) spectrum of 8

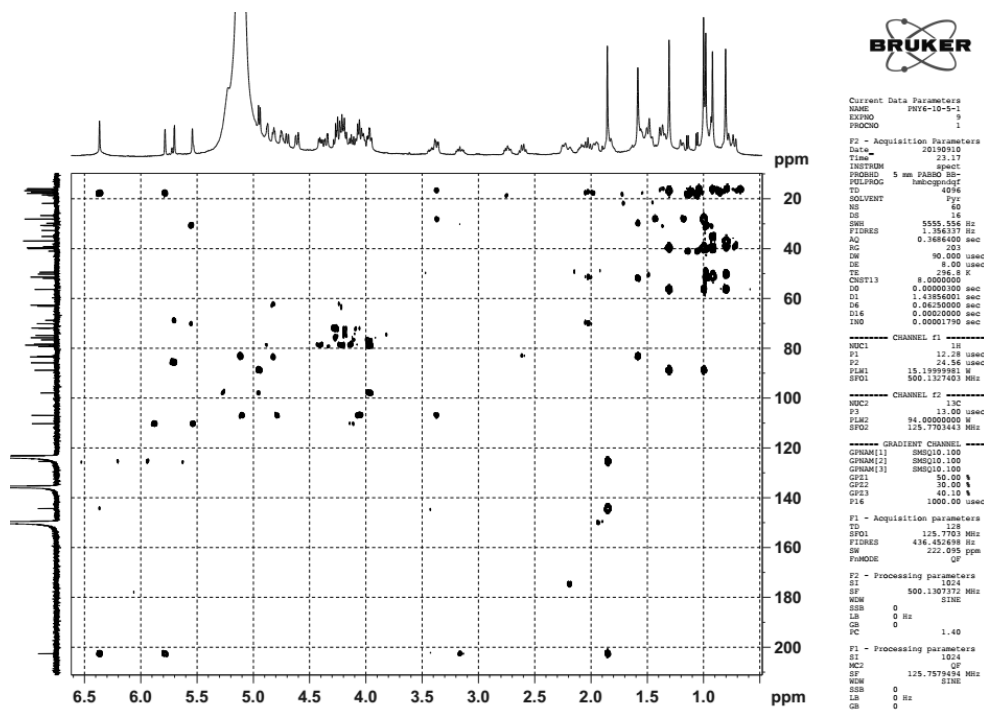

Figure S52 HMBC (C<sub>5</sub>D<sub>5</sub>N) spectrum of 8

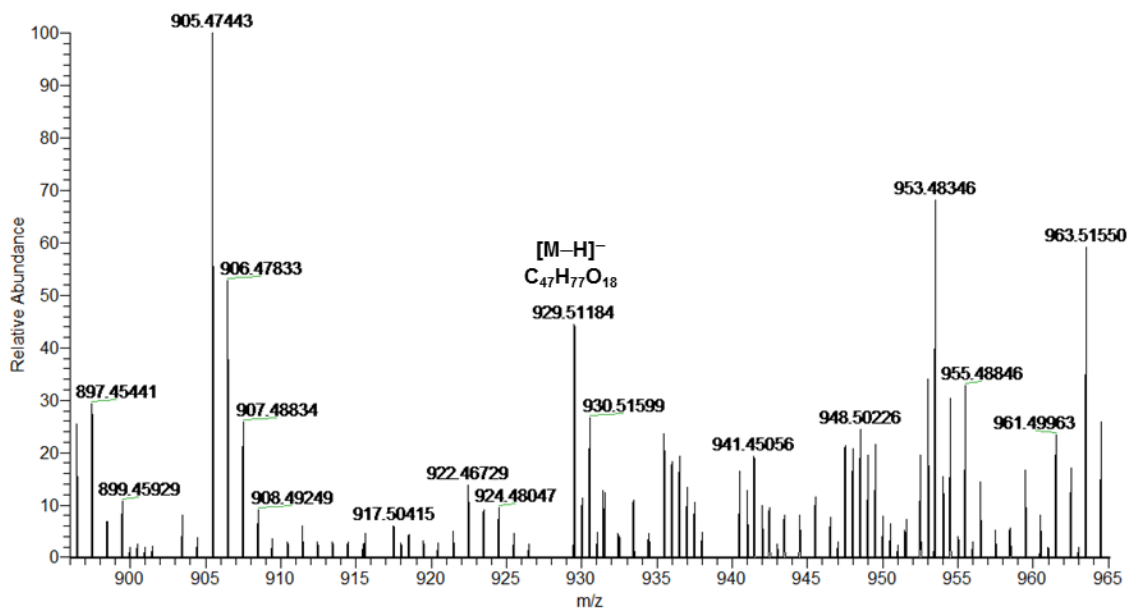

Figure S53 ESI-Q-Orbitrap-MS spectrum of 8



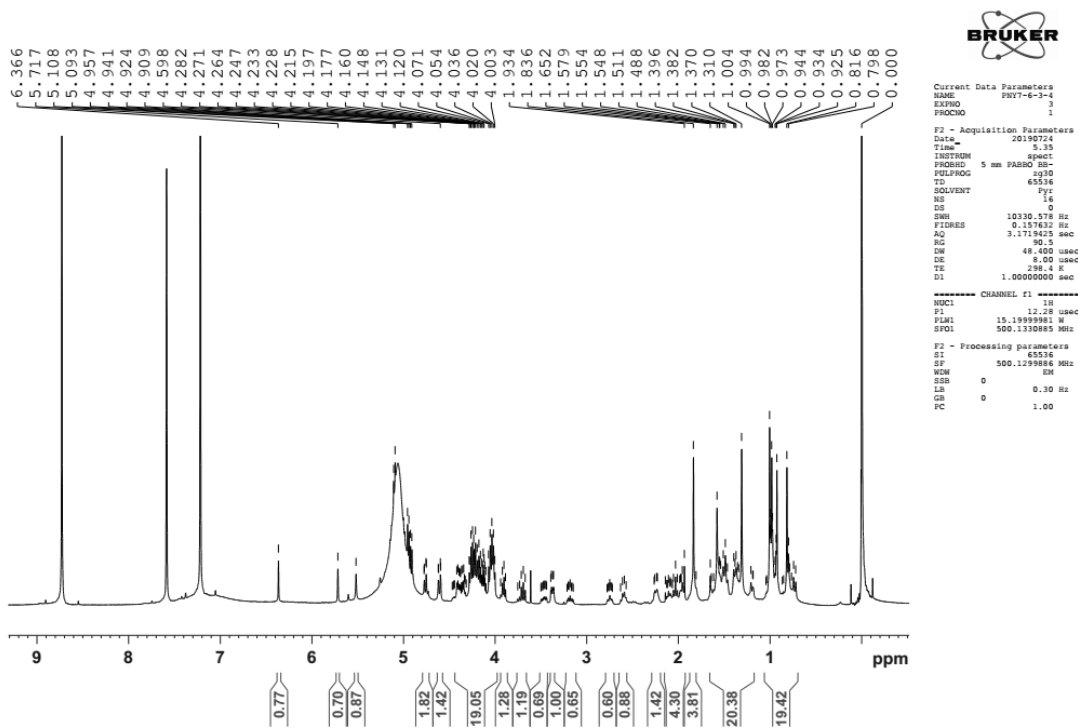

Figure S54 <sup>1</sup>H NMR (500 MHz, C<sub>5</sub>D<sub>5</sub>N) spectrum of 9

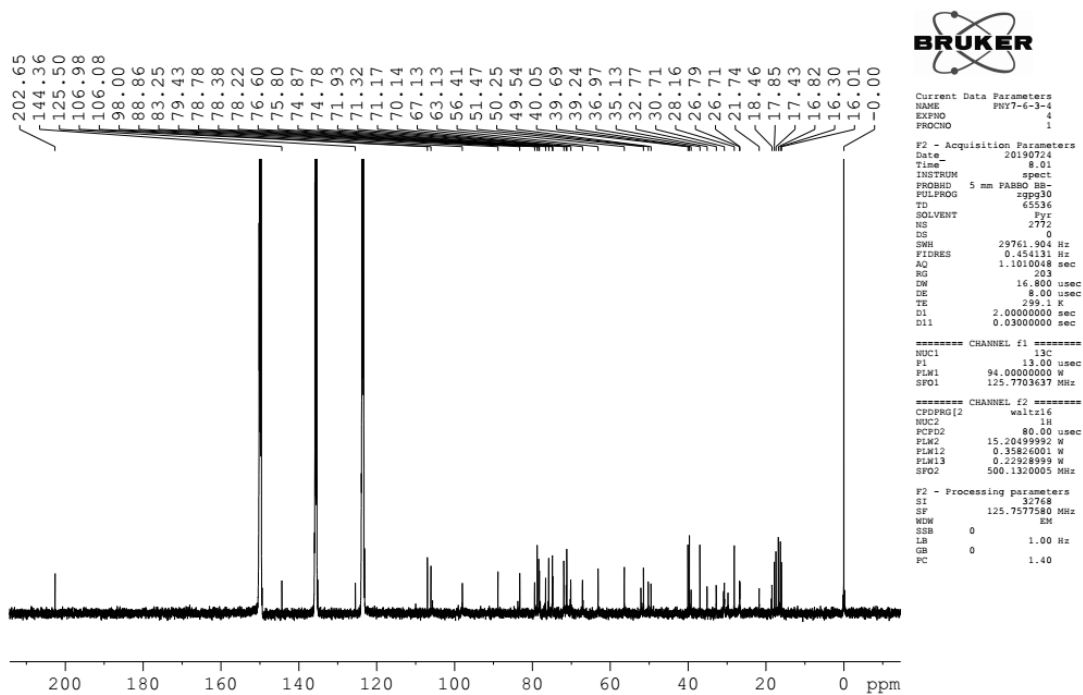

Figure S55 <sup>13</sup>C NMR (125 MHz, C<sub>5</sub>D<sub>5</sub>N) spectrum of 9

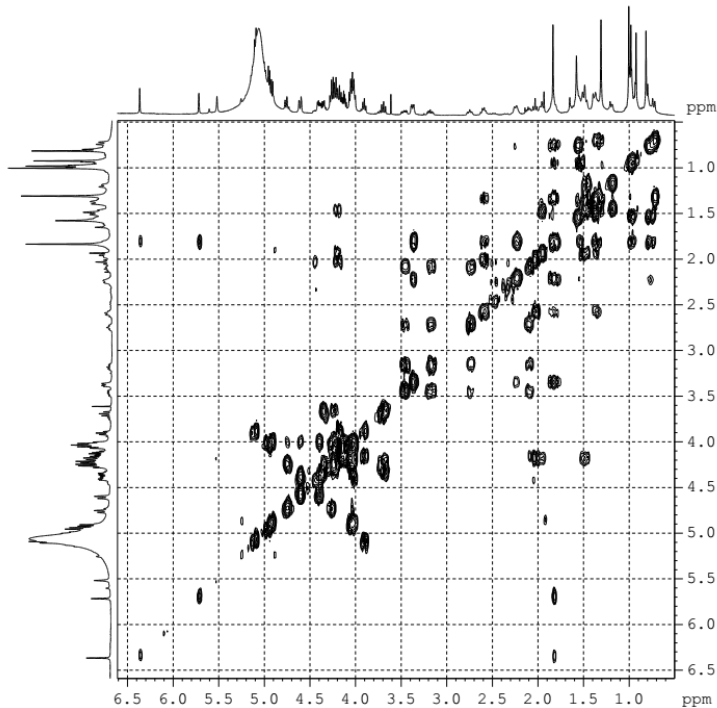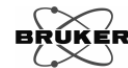

```

Current Data Parameters
NAME          PH77-6-3-4
EXPNO        8
PROCNO       1

F2 - Acquisition Parameters
Date_        20190819
Time         13.51
INSTRUM      spect
PROBHD       5 mm F4BBO BB-
PULPROG      cosypppafgr
TD           65536
SOLVENT      Fyr
NS           16
DS           4
SWH           6684.432 Hz
FIDRES       3.243912 Hz
AQ           0.1531904 sec
RG           203
DM           74.800 usec
DE           8.00 usec
TE           295.7 K
D0           0.0000000 sec
D1           2.0000000 sec
D11          0.0000000 sec
D16          0.0002000 sec
IND          0.00014960 sec

===== CHANNEL f1 =====
NUC1         1H
P1           12.228 usec
PULSE1      15.1999981 W
SFO1        500.1330069 MHz

===== GRADIENT CHANNEL =====
GPRAM[1]    SMCQ10.100
GPRAM[2]    SMCQ10.100
GPRAM[3]    SMCQ10.100
GPE1        16.00 V
GPE2        12.00 V
GPE3        4.00 V
P16         1000.00 usec

F1 - Acquisition parameters
TD           128
SFO1        500.133 MHz
FIDRES      104.448320 Hz
SW          13.365 ppm
PULPROG     cp
PC          1.40

F2 - Processing parameters
SI           1024
SF           500.1307419 MHz
WDW          SINC
SSB          0 Hz
LB           0 Hz
GB           0
PC           1.40

F1 - Processing parameters
SI           1024
SF           500.1307416 MHz
WDW          SINC
SSB          0 Hz
LB           0 Hz
GB           0
  
```

Figure S56  $^1\text{H}$   $^1\text{H}$  COSY ( $\text{C}_5\text{D}_5\text{N}$ ) spectrum of 9

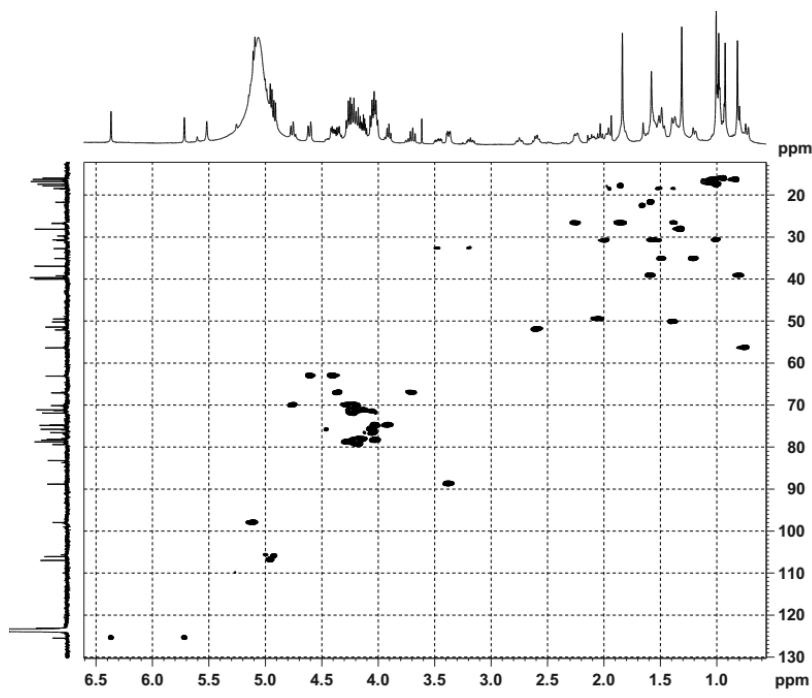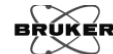

```

Current Data Parameters
NAME          PH77-6-3-4
EXPNO        5
PROCNO       1

F2 - Acquisition Parameters
Date_        20190724
Time         8.04
INSTRUM      spect
PROBHD       5 mm F4BBO BB-
PULPROG      hsqcqp1
TD           65536
SOLVENT      Fyr
NS           16
DS           4
SWH           5883.352 Hz
FIDRES       5.744465 Hz
AQ           0.0978000 sec
RG           203
DM           85.000 usec
DE           8.00 usec
TE           298.2 K
D0           0.0000000 sec
D1           1.4895500 sec
D11          0.0017111 sec
D16          0.0000000 sec
D18          0.0000000 sec
D19          0.0000000 sec
D24          0.0011000 sec
IND          0.0002400 sec

===== CHANNEL f1 =====
NUC1         1H
P1           12.28 usec
P2           24.56 usec
P2B         0.10 usec
PULSE1      15.1999981 W
SFO1        500.1319239 MHz

===== CHANNEL f2 =====
GRAB[1]     13C
NUC2        13C
P3           13.00 usec
P4           16.00 usec
P5           16.00 usec
P6           16.00 usec
P7         94.0000000 W
P8         3.24200010 W
P9         125.767168 MHz

===== GRADIENT CHANNEL =====
GPRAM[1]    SMCQ10.100
GPRAM[2]    SMCQ10.100
GPE1        16.00 V
GPE2        12.00 V
GPE3        4.00 V
P16         1000.00 usec

F1 - Acquisition parameters
TD           256
SFO1        125.7672 MHz
FIDRES      162.739840 Hz
SW          145.639 ppm
PULPROG     Echu-Muon-echo
PC          1.40

F2 - Processing parameters
SI           1024
SF           500.1299824 MHz
WDW          SINC
SSB          0 Hz
LB           2
GB           0
PC           1.40

F1 - Processing parameters
SI           1024
SF           125.7577649 MHz
WDW          SINC
SSB          0 Hz
LB           2
GB           0
  
```

Figure S57 HSQC ( $\text{C}_5\text{D}_5\text{N}$ ) spectrum of 9

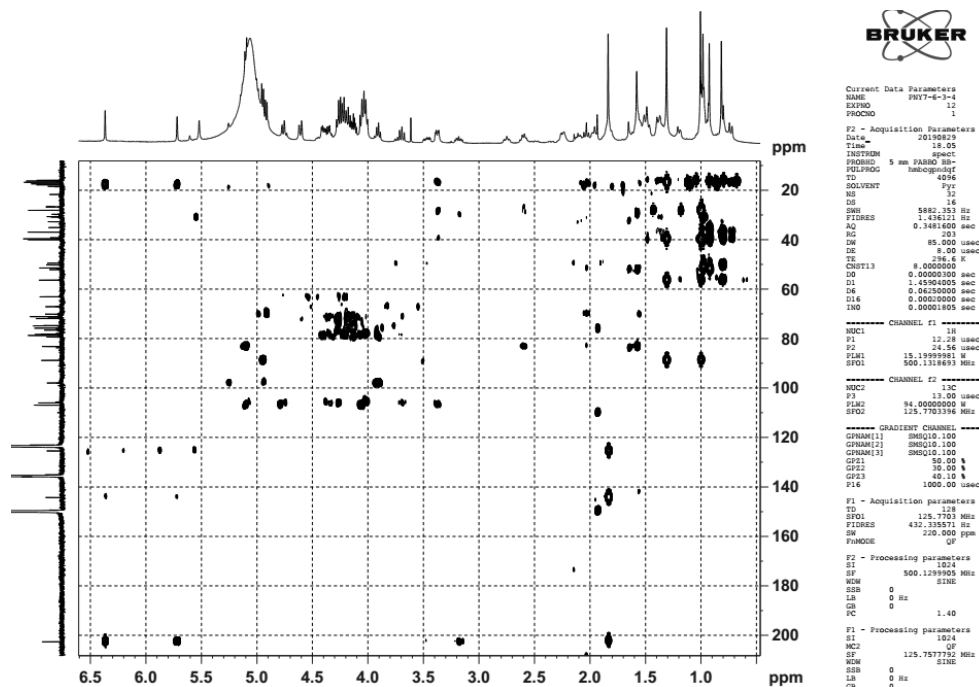

Figure S58 HMBC (C<sub>5</sub>D<sub>5</sub>N) spectrum of 9

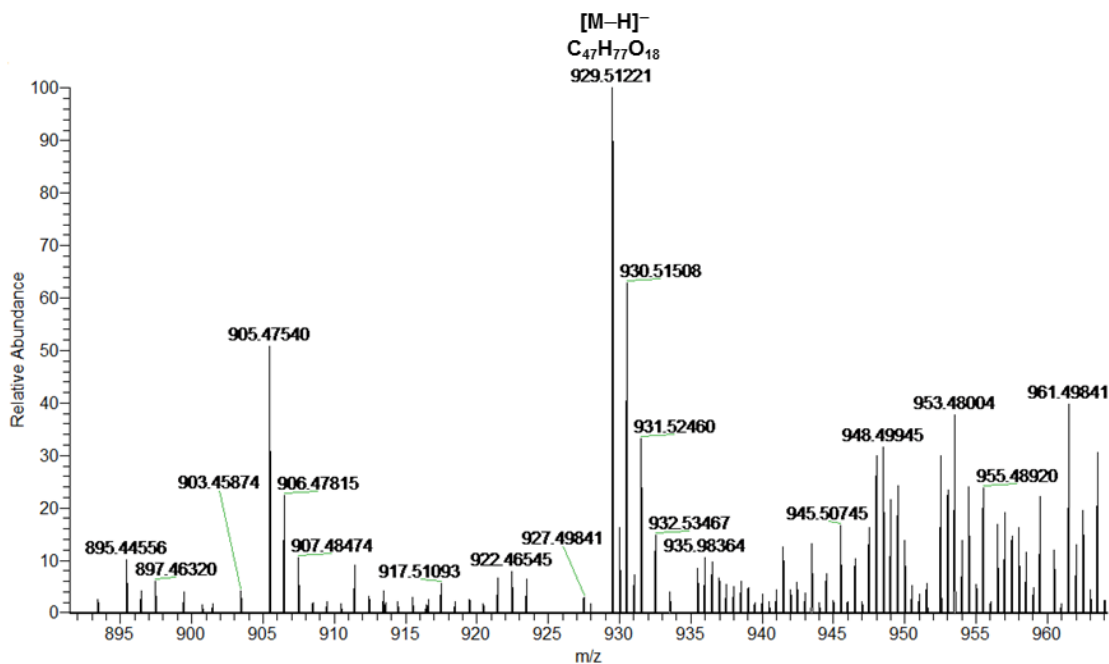

Figure S59 ESI-Q-Orbitrap-MS spectrum of 9

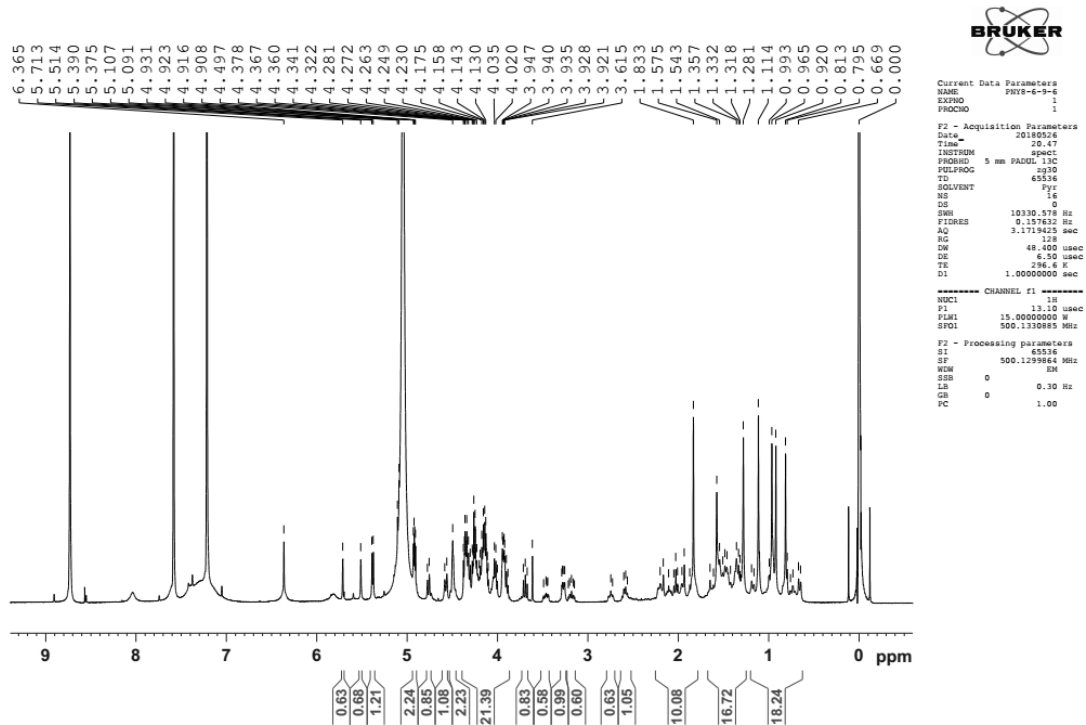

Figure S60 <sup>1</sup>H NMR (500 MHz, C<sub>5</sub>D<sub>5</sub>N) spectrum of PNY8-6-9-6 (10)

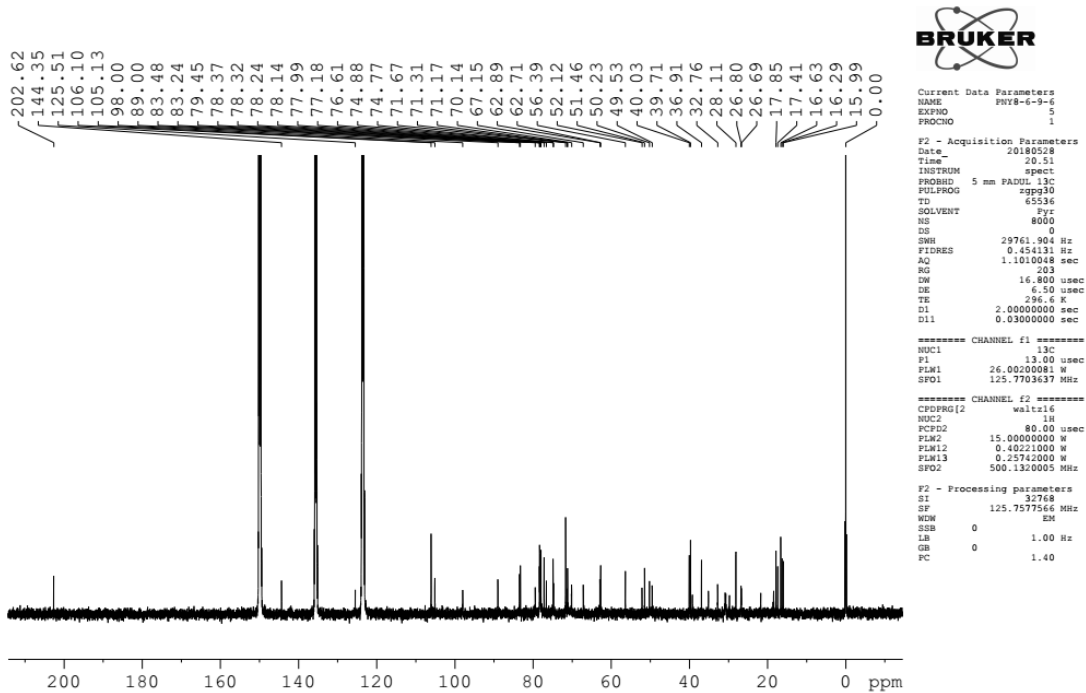

Figure S61 <sup>13</sup>C NMR (125 MHz, C<sub>5</sub>D<sub>5</sub>N) spectrum of 10

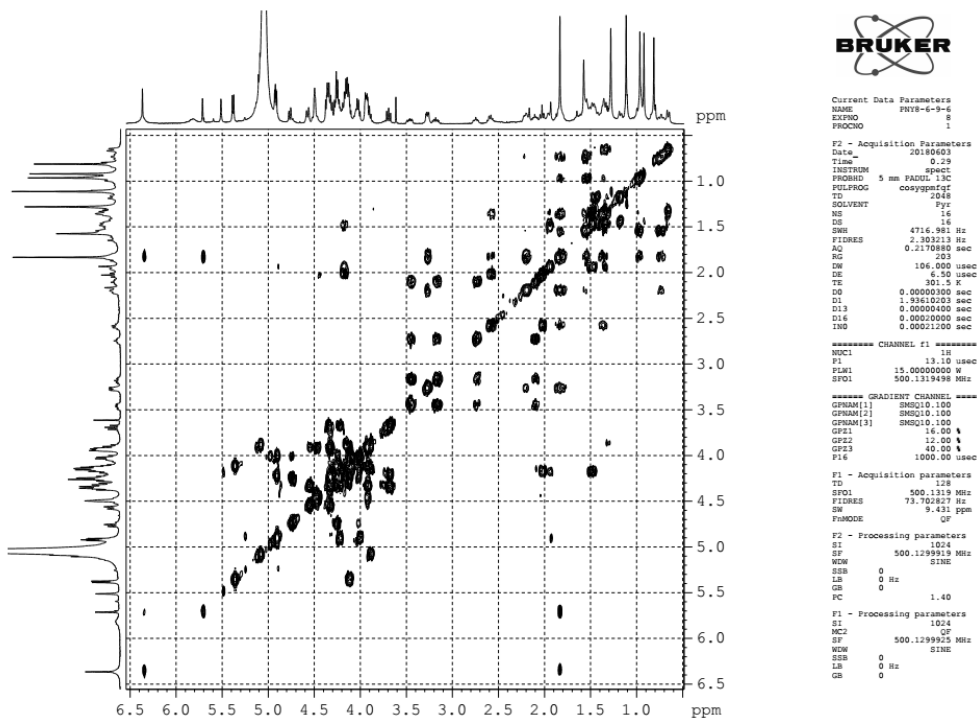

Figure S62 <sup>1</sup>H <sup>1</sup>H COSY (C<sub>5</sub>D<sub>5</sub>N) spectrum of 10

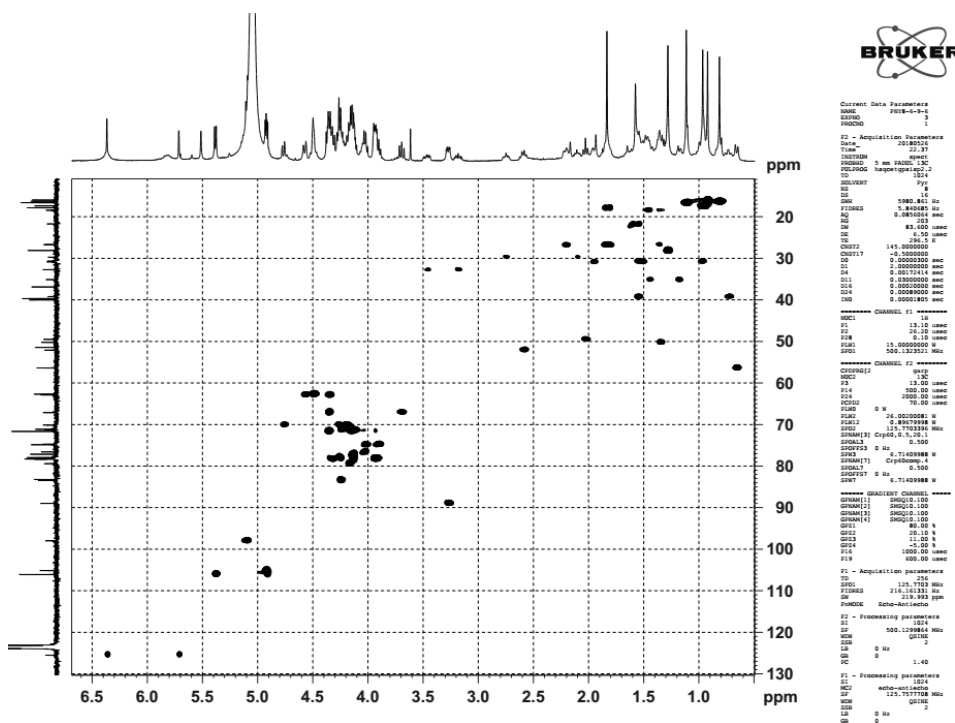

Figure S63 HSQC (C<sub>5</sub>D<sub>5</sub>N) spectrum of 10

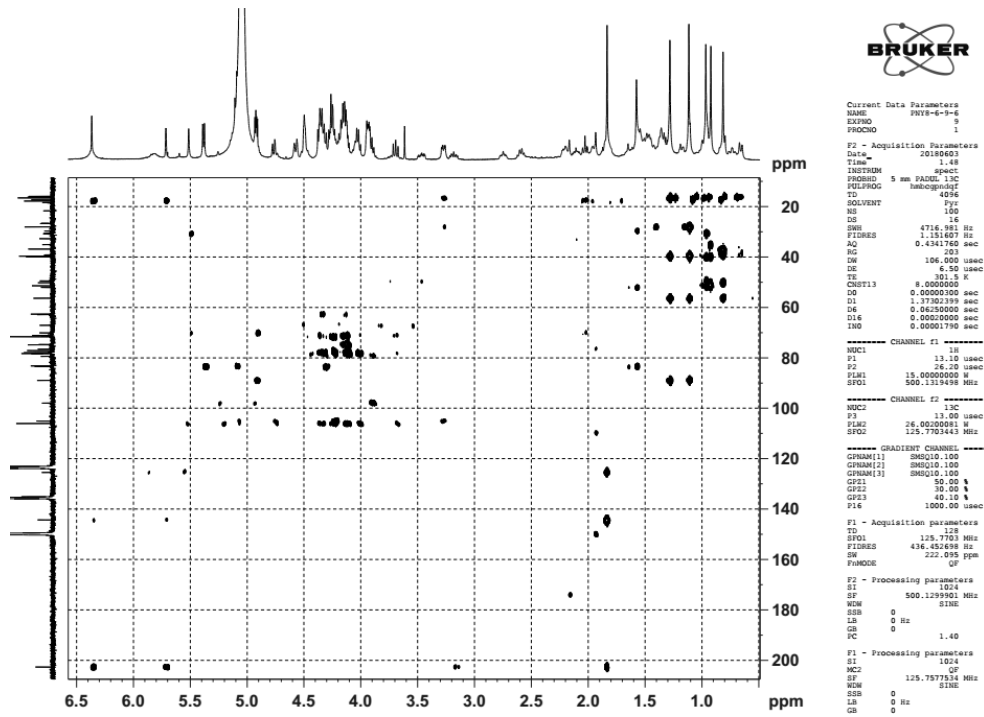

Figure S64 HMBIC (C<sub>5</sub>D<sub>5</sub>N) spectrum of 10

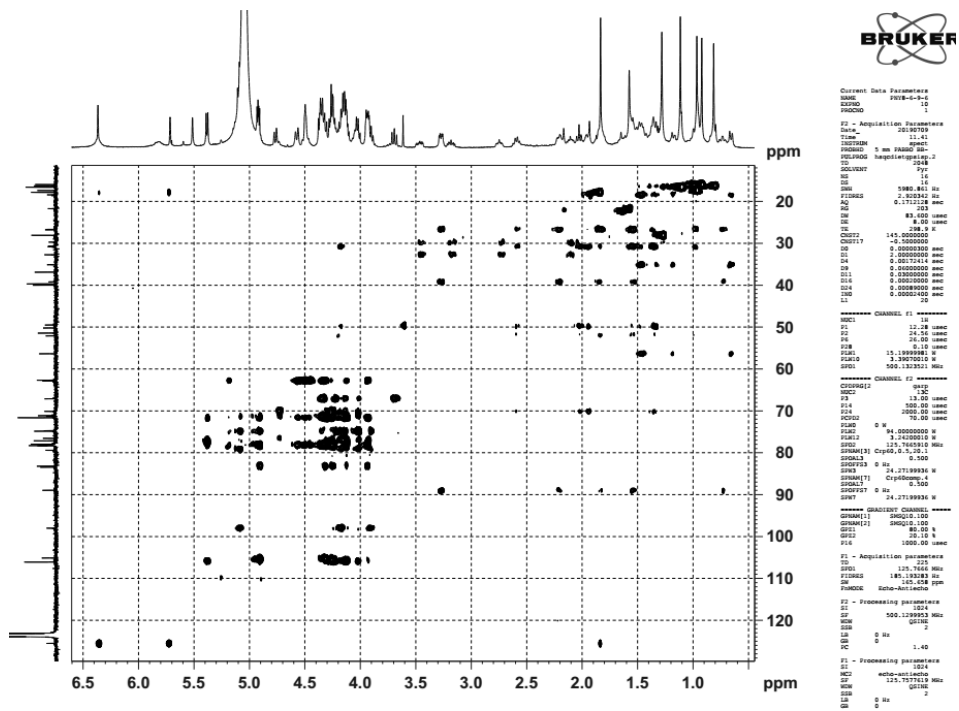

Figure S65 HSQC-TOCSY (C<sub>5</sub>D<sub>5</sub>N) spectrum of 10

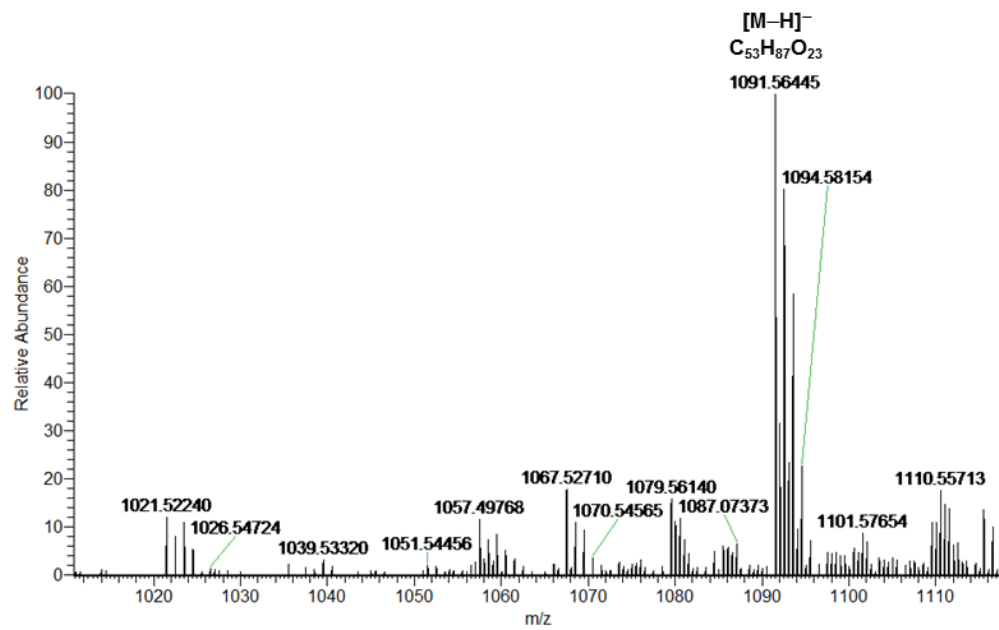

Figure S66 ESI-Q-Orbitrap-MS spectrum of 10

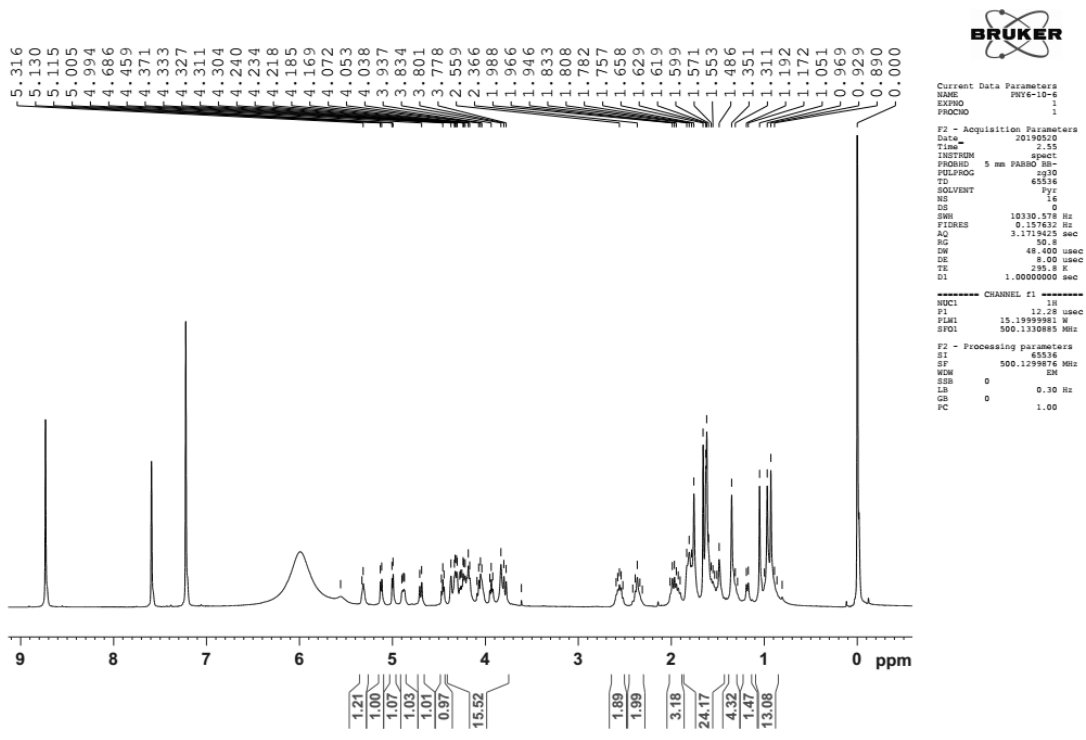

Figure S67 <sup>1</sup>H NMR (500 MHz, C<sub>5</sub>D<sub>5</sub>N) spectrum of 11

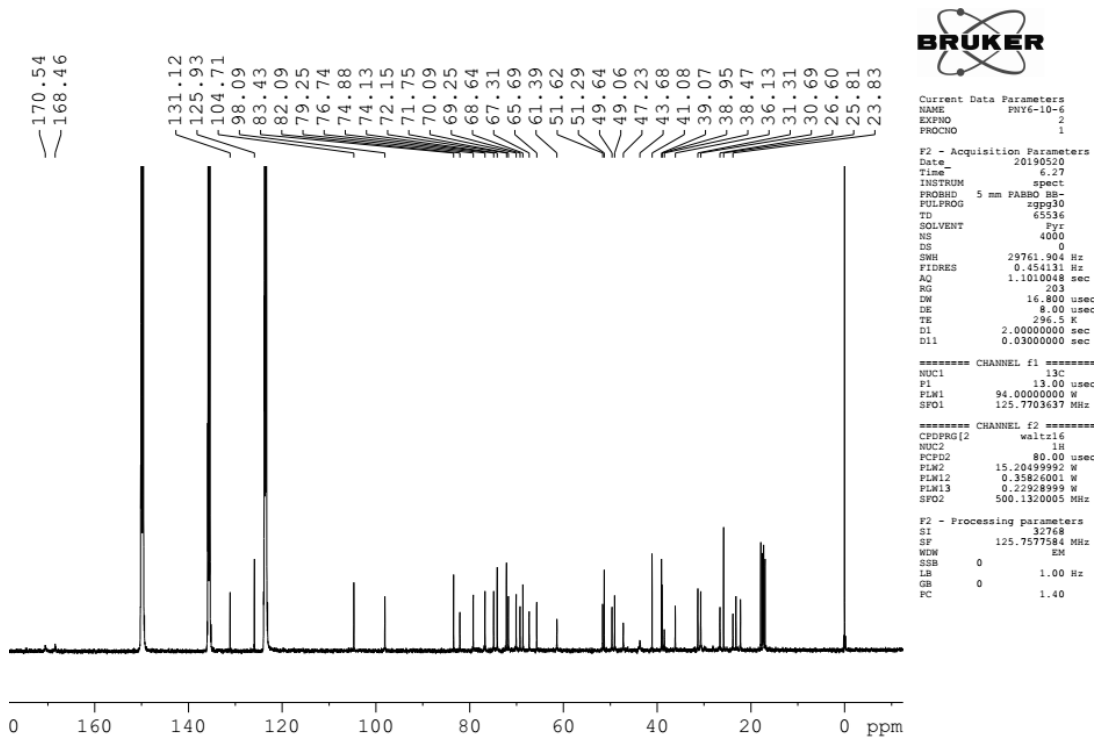



Figure S68  $^{13}\text{C}$  NMR (125 MHz,  $\text{C}_5\text{D}_5\text{N}$ ) spectrum of 11

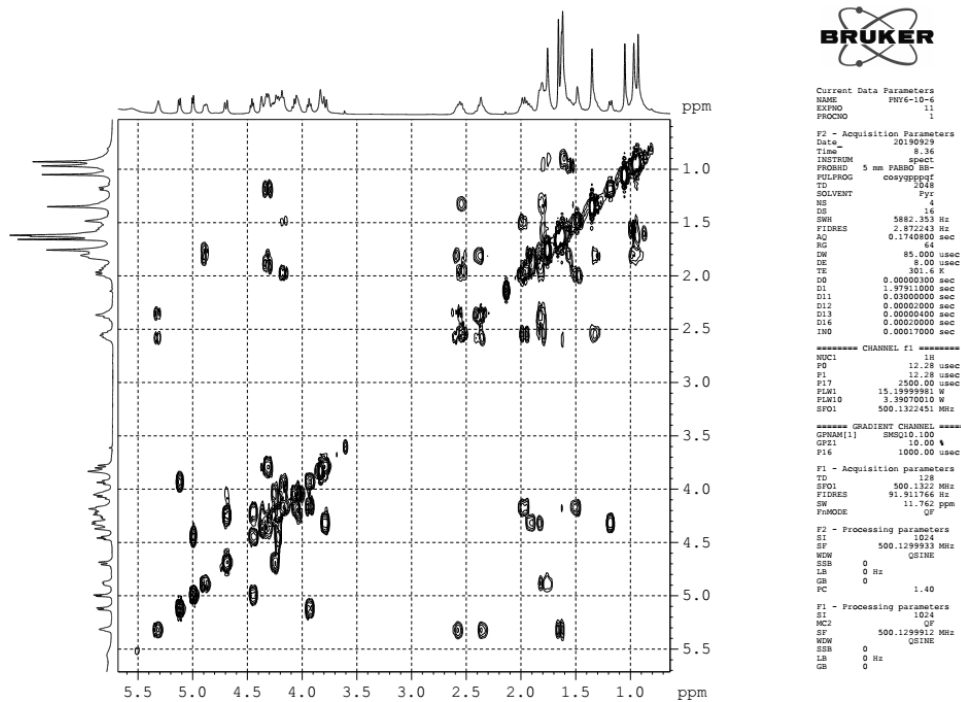

Figure S69  $^1\text{H}$   $^1\text{H}$  COSY ( $\text{C}_5\text{D}_5\text{N}$ ) spectrum of 11

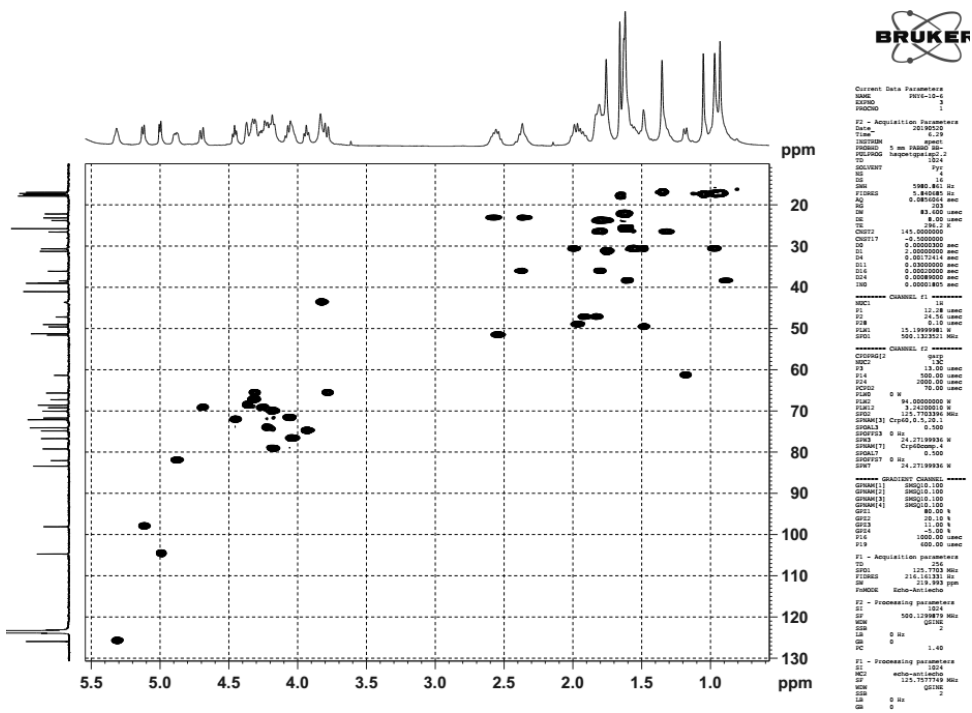

Figure S70 HSQC ( $\text{C}_5\text{D}_5\text{N}$ ) spectrum of 11

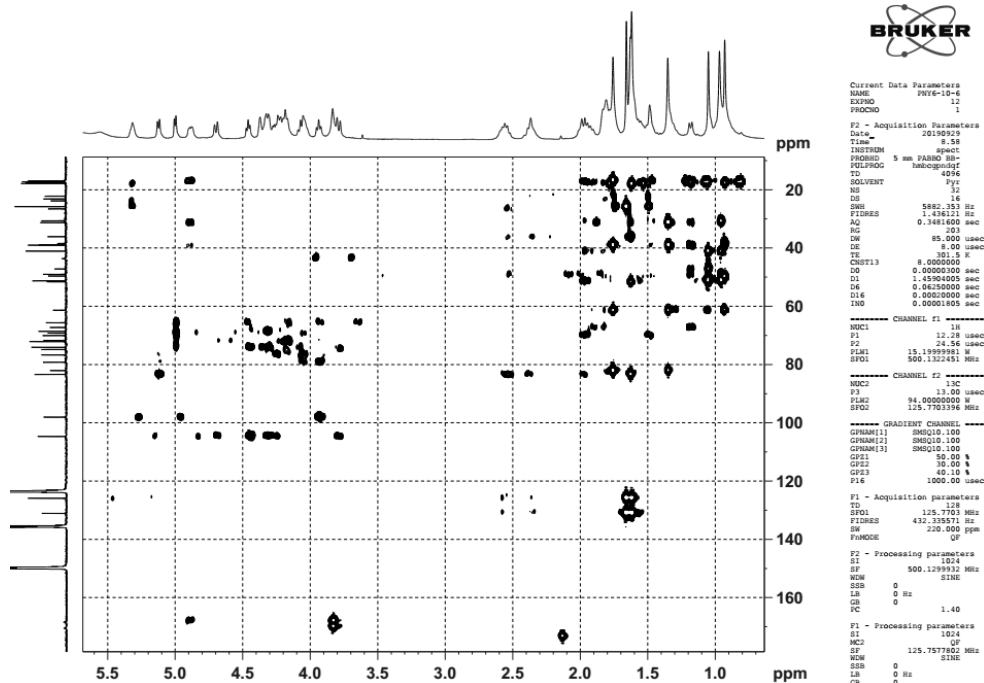

Figure S71 HMQC ( $C_5D_5N$ ) spectrum of 11

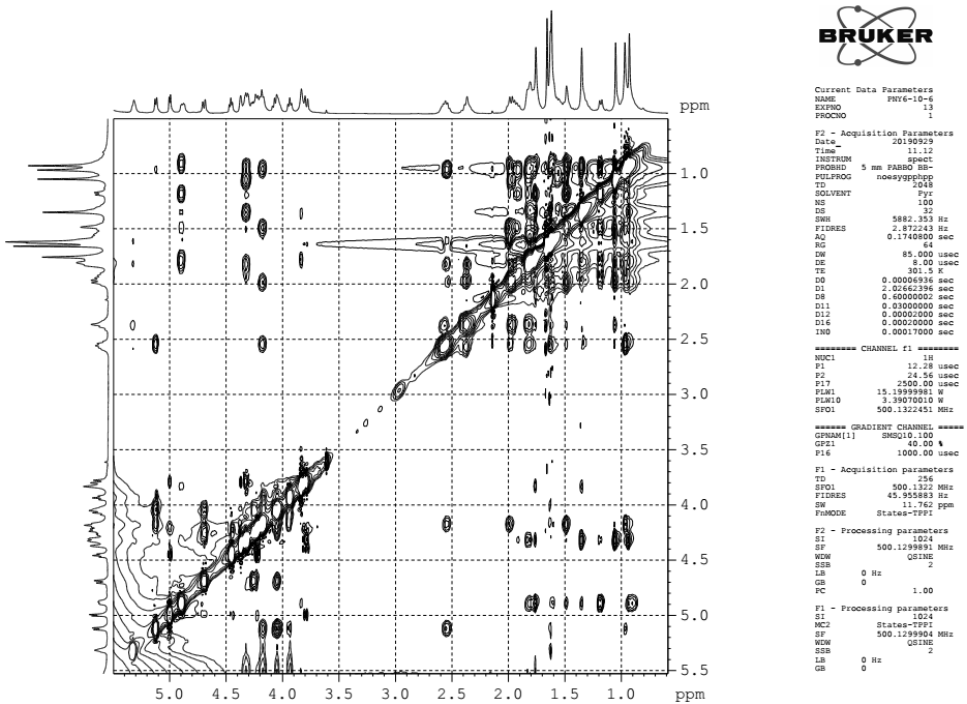

Figure S72 NOESY ( $C_5D_5N$ ) spectrum of 11

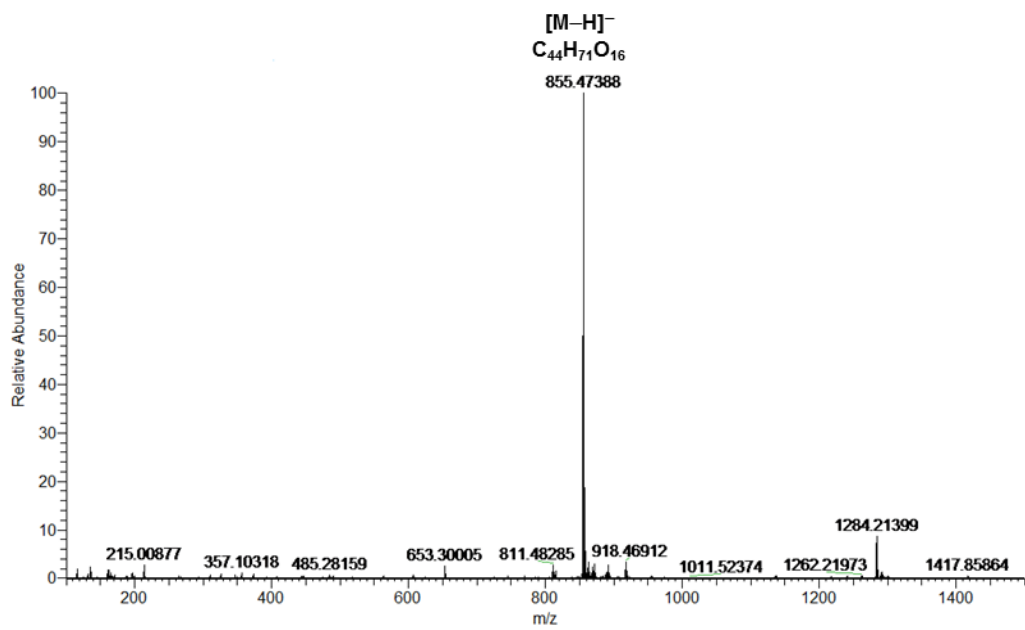

Figure S73 ESI-Q-Orbitrap-MS spectrum of 11

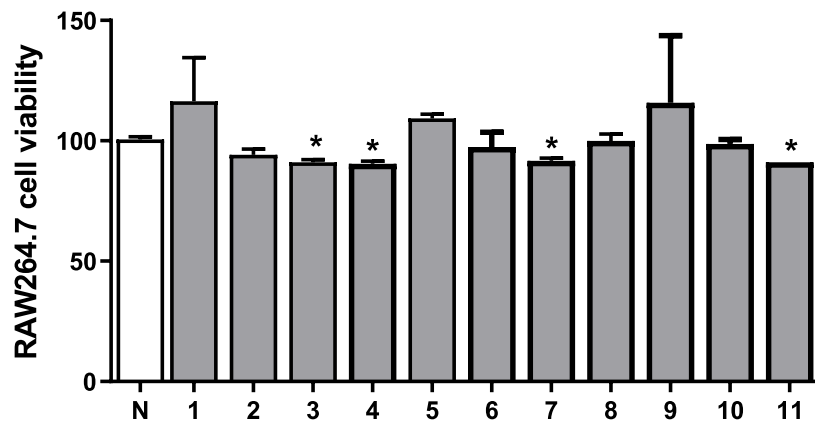

Figure S74 MTT assay of compounds 1-11 at the concentration of 50 μM
